# Supplementary material for: Dual transition metal atoms embedded in N-doped graphene for electrochemical nitrogen fixation under ambient conditions
Source: Royal Society of Chemistry journal article supplement (doi:10.1039/d1ta11024a), 2022-01-01
Supplement: d1ta11024a1.pdf [file d1ta11024a1.pdf]

## Supporting Information for

# Dual transition metal atoms embedded N-doped graphene for electrochemical nitrogen fixation under ambient conditions

Yi Liu, Bingyi Song, Chun-Xiang Huang and Li-Ming Yang\*

*Hubei Key Laboratory of Bioinorganic Chemistry and Materia Medica; Key Laboratory of Material Chemistry for Energy Conversion and Storage, Ministry of Education; Hubei Key Laboratory of Materials Chemistry and Service Failure; Hubei Engineering Research Center for Biomaterials and Medical Protective Materials; School of Chemistry and Chemical Engineering, Huazhong University of Science and Technology, Wuhan 430074, China. (email: [Lmyang.uio@gmail.com](mailto:Lmyang.uio@gmail.com), [Lmyang@hust.edu.cn](mailto:Lmyang@hust.edu.cn))*

**Table S1.** Gibbs free energy changes of N<sub>2</sub> adsorption on M<sub>2</sub>-DV series.

**Table S2.** The N–N bond lengths of N<sub>2</sub> adsorption on M<sub>2</sub>-DV series.

**Table S3.** Gibbs free energy changes of N<sub>2</sub> adsorption on M<sub>2</sub>-TV series.

**Table S4.** The N–N bond lengths of N<sub>2</sub> adsorption on M<sub>2</sub>-TV series.

**Table S5.** Gibbs free energy changes of N<sub>2</sub> adsorption on M<sub>2</sub>-QV series.

**Table S6.** The N–N bond lengths of N<sub>2</sub> adsorption on M<sub>2</sub>-QV series.

**Table S7.** Gibbs free energy changes of the first protonation step for M<sub>2</sub>-DV series.

**Table S8.** Gibbs free energy changes of the last (sixth) protonation step for M<sub>2</sub>-DV series.

**Table S9.** Gibbs free energy changes of the first protonation step for M<sub>2</sub>-TV series.

**Table S10.** Gibbs free energy changes of the last (sixth) protonation step for M<sub>2</sub>-TV series.

**Table S11.** Gibbs free energy changes of the first protonation step for M<sub>2</sub>-QV series.

**Table S12.** Gibbs free energy changes of the last (sixth) protonation step for M<sub>2</sub>-QV series.

**Figure S1.** Gibbs free energy diagrams for NRR on V<sub>2</sub>-TV, Cr<sub>2</sub>-TV, Fe<sub>2</sub>-QV, Mo<sub>2</sub>-TV, Rh<sub>2</sub>-TV, Os<sub>2</sub>-DV and Ir<sub>2</sub>-TV catalysts.

**Table S13.** On Cr<sub>2</sub>-TV, Mo<sub>2</sub>-TV and Ir<sub>2</sub>-TV catalysts, the evolution length of N-N bond through eight different reaction pathways.

**Table S14.** Onset potential of NRR and the corresponding magnetic moment for catalysts that meet three screening procedures.

**Table S15.** The charge variations (the Bader charge variation of each intermediate between two adjacent steps) on the Cr<sub>2</sub>-TV catalyst for NRR through (a) distal and (b) distal-alternating pathway.

**Table S16.** The charge variations (the Bader charge variation of each intermediate between two adjacent steps) on the Mo<sub>2</sub>-TV catalyst for NRR through (c) consecutive pathway, (d) distal pathways, (e) enzymatic-consecutive pathway.

**Table S17.** The charge variations (the Bader charge variation of each intermediate between two adjacent steps) on the Ir<sub>2</sub>-TV catalyst for NRR through (f) consecutive-enzymatic pathway, (g) enzymatic-consecutive pathway and (h) consecutive-enzymatic pathway.

**Table S18.** The comparison of the catalytic performance between U<sub>onset</sub>-HER and U<sub>onset</sub>-NRR.

**Figure S2.** (a) The evolution curve of temperature and energy versus the simulation time for the Cr<sub>2</sub>-TV catalyst. (b) The top and side views of the snapshots of Cr<sub>2</sub>-TV catalyst before and after AIMD simulations. The simulations were performed at 600 K for 10 ps with a time step of 2 fs.

**Figure S3.** (a) The evolution curve of temperature and energy versus the simulation time for the Mo<sub>2</sub>-TV catalyst. (b) The top and side views of the snapshots of Mo<sub>2</sub>-TV catalyst before and after AIMD simulations. The simulations were performed at 600 K for 10 ps with a time step of 2 fs.

**Figure S3.** (a) The evolution curve of temperature and energy versus the simulation time for the Mo<sub>2</sub>-TV catalyst. (b) The top and side views of the snapshots of Mo<sub>2</sub>-TV catalyst before and after AIMD simulations. The simulations were performed at 600 K for 10 ps with a time step of 2 fs.

**Figure S4.** (a) The evolution curve of temperature and energy versus the simulation time for the Ir<sub>2</sub>-TV catalyst. (b) The top and side views of the snapshots of Ir<sub>2</sub>-TV catalyst before and after AIMD simulations. The simulations were performed at 600 K for 10 ps with a time step of 2 fs.

**Table S19.** The structure, lattice constant, space group and point group of catalysts.

**Table S1.** Gibbs free energy changes of N<sub>2</sub> adsorption on M<sub>2</sub>-DV series.

| $\Delta G$ (eV)     | $(M^*-M^*)_S^L$ | $(M^*-M^*)_S^R$ | $(M^*-M)_S^L$ | $(M-M^*)_S^R$ | $(M^*-M^*)_S$ | $(M^*-M)_E^L$ | $(M-M^*)_E^R$ |
|---------------------|-----------------|-----------------|---------------|---------------|---------------|---------------|---------------|
| Sc <sub>2</sub> -DV | -1.42           | /               | /             | /             | /             | /             | /             |
| Ti <sub>2</sub> -DV | -2.23           | /               | /             | /             | /             | /             | /             |
| V <sub>2</sub> -DV  | -1.83           | /               | /             | /             | /             | /             | /             |
| Cr <sub>2</sub> -DV | /               | -1.11/          | /             | /             | /             | -1.24         | /             |
| Mn <sub>2</sub> -DV | -0.28           | /               | /             | /             | /             | -0.35         | -0.23         |
| Fe <sub>2</sub> -DV | -0.11           | /               | /             | /             | -0.11         | -0.30         | /             |
| Co <sub>2</sub> -DV | /               | /               | /             | /             | /             | -0.51         | /             |
| Ni <sub>2</sub> -DV | /               | /               | /             | /             | /             | -0.13         | /             |
| Cu <sub>2</sub> -DV | /               | /               | /             | /             | /             | 0.08          | /             |
| Zn <sub>2</sub> -DV | /               | /               | /             | /             | /             | 0.06          | /             |
| Y <sub>2</sub> -DV  | -1.04           | /               | /             | /             | /             | /             | /             |
| Zr <sub>2</sub> -DV | /               | -2.30           | /             | /             | /             | /             | /             |
| Nb <sub>2</sub> -DV | -2.10           | /               | /             | /             | /             | /             | /             |
| Mo <sub>2</sub> -DV | -0.57           | /               | /             | /             | /             | -0.73         | /             |
| Tc <sub>2</sub> -DV | /               | /               | /             | /             | /             | -0.24         | /             |
| Ru <sub>2</sub> -DV | /               | /               | /             | -0.19         | /             | /             | -0.87         |
| Rh <sub>2</sub> -DV | /               | /               | -0.23         | /             | /             | -0.73         | /             |
| Pd <sub>2</sub> -DV | /               | /               | /             | /             | /             | -0.31         | /             |
| Ag <sub>2</sub> -DV | /               | /               | /             | /             | 0.38          | -0.04         | /             |
| Cd <sub>2</sub> -DV | /               | /               | /             | /             | 0.28          | /             | /             |
| Lu <sub>2</sub> -DV | -0.81           | /               | /             | /             | /             | -0.13         | /             |
| Hf <sub>2</sub> -DV | -2.31           | /               | /             | /             | /             | -0.66         | /             |
| Ta <sub>2</sub> -DV | /               | -2.35           | /             | /             | /             | /             | /             |
| W <sub>2</sub> -DV  | -1.49           | /               | /             | /             | /             | -1.27         | /             |
| Re <sub>2</sub> -DV | -0.58           | /               | /             | -0.56         | /             | -0.93         | /             |
| Os <sub>2</sub> -DV | /               | /               | /             | /             | -0.88         | -1.17         | /             |
| Ir <sub>2</sub> -DV | /               | /               | /             | /             | /             | -0.92         | /             |
| Pt <sub>2</sub> -DV | /               | /               | 0.21          | /             | /             | /             | /             |
| Au <sub>2</sub> -DV | /               | /               | /             | /             | 0.45          | /             | /             |

**Notes:** / means that the configuration of the N<sub>2</sub> adsorption doesn't exist. An asterisk \* denotes the active site on the surface of catalysts that the adsorbed N<sub>2</sub> connected to. The M means the transition metal atom (3d, 4d and 5d series). The subscripts E and S represent the end-on and side-on configurations, respectively. The superscripts L and R mean that adsorbed N<sub>2</sub> molecules are closer to the left and right sides of M<sub>2</sub>, respectively.

**Table S2.** The N–N bond lengths of N<sub>2</sub> adsorption on M<sub>2</sub>-DV series.

| $\Delta G$ (eV)     | (M*-M*) <sub>S</sub> <sup>L</sup> | (M*-M*) <sub>S</sub> <sup>R</sup> | (M*-M) <sub>S</sub> <sup>L</sup> | (M-M*) <sub>S</sub> <sup>R</sup> | (M*-M*) <sub>S</sub> | (M*-M) <sub>E</sub> <sup>L</sup> | (M-M*) <sub>E</sub> <sup>R</sup> |
|---------------------|-----------------------------------|-----------------------------------|----------------------------------|----------------------------------|----------------------|----------------------------------|----------------------------------|
| Sc <sub>2</sub> -DV | 1.207                             | /                                 | /                                | /                                | /                    | /                                | /                                |
| Ti <sub>2</sub> -DV | 1.225                             | /                                 | /                                | /                                | /                    | /                                | /                                |
| V <sub>2</sub> -DV  | 1.230                             | /                                 | /                                | /                                | /                    | /                                | /                                |
| Cr <sub>2</sub> -DV | /                                 | 1.199                             | /                                | /                                | /                    | 1.157                            | /                                |
| Mn <sub>2</sub> -DV | 1.195                             | /                                 | /                                | /                                | /                    | 1.155                            | 1.136                            |
| Fe <sub>2</sub> -DV | 1.175                             | /                                 | /                                | /                                | 1.194                | 1.137                            | /                                |
| Co <sub>2</sub> -DV | /                                 | /                                 | /                                | /                                | /                    | 1.139                            | /                                |
| Ni <sub>2</sub> -DV | /                                 | /                                 | /                                | /                                | /                    | 1.131                            | /                                |
| Cu <sub>2</sub> -DV | /                                 | /                                 | /                                | /                                | /                    | 1.124                            | /                                |
| Zn <sub>2</sub> -DV | /                                 | /                                 | /                                | /                                | /                    | 1.125                            | /                                |
| Y <sub>2</sub> -DV  | 1.211                             | /                                 | /                                | /                                | /                    | /                                | /                                |
| Zr <sub>2</sub> -DV | /                                 | 1.238                             | /                                | /                                | /                    | /                                | /                                |
| Nb <sub>2</sub> -DV | 1.243                             | /                                 | /                                | /                                | /                    | /                                | /                                |
| Mo <sub>2</sub> -DV | 1.302                             | /                                 | /                                | /                                | /                    | 1.155                            | /                                |
| Tc <sub>2</sub> -DV | /                                 | /                                 | /                                | /                                | /                    | 1.131                            | /                                |
| Ru <sub>2</sub> -DV | /                                 | /                                 | /                                | 1.159                            | /                    | /                                | 1.137                            |
| Rh <sub>2</sub> -DV | /                                 | /                                 | 1.153                            | /                                | /                    | 1.131                            | /                                |
| Pd <sub>2</sub> -DV | /                                 | /                                 | /                                | /                                | /                    | 1.126                            | /                                |
| Ag <sub>2</sub> -DV | /                                 | /                                 | /                                | /                                | 1.144                | 1.120                            | /                                |
| Cd <sub>2</sub> -DV | /                                 | /                                 | /                                | /                                | 1.158                | /                                | /                                |
| Lu <sub>2</sub> -DV | 1.217                             | /                                 | /                                | /                                | /                    | 1.140                            | /                                |
| Hf <sub>2</sub> -DV | 1.252                             | /                                 | /                                | /                                | /                    | 1.150                            | /                                |
| Ta <sub>2</sub> -DV | /                                 | 1.272                             | /                                | /                                | /                    | /                                | /                                |
| W <sub>2</sub> -DV  | 1.374                             | /                                 | /                                | /                                | /                    | 1.155                            | /                                |
| Re <sub>2</sub> -DV | 1.281                             | /                                 | /                                | 1.190                            | /                    | 1.147                            | /                                |
| Os <sub>2</sub> -DV | /                                 | /                                 | /                                | /                                | 1.217                | 1.144                            | /                                |
| Ir <sub>2</sub> -DV | /                                 | /                                 | /                                | /                                | /                    | 1.136                            | /                                |
| Pt <sub>2</sub> -DV | /                                 | /                                 | 1.162                            | /                                | /                    | /                                | /                                |
| Au <sub>2</sub> -DV | /                                 | /                                 | /                                | /                                | 1.173                | /                                | /                                |

**Notes:** / means that the configuration of the N<sub>2</sub> adsorption doesn't exist. An asterisk \* denotes the active site on the surface of catalysts that the adsorbed N<sub>2</sub> connected to. The M means the transition metal atom (3d, 4d and 5d series). The subscripts E and S represent the end-on and side-on configurations, respectively. The superscripts L and R mean that adsorbed N<sub>2</sub> molecules are closer to the left and right sides of M<sub>2</sub>, respectively.

**Table S3.** Gibbs free energy changes of N<sub>2</sub> adsorption on M<sub>2</sub>-TV series.

| $\Delta G$ (eV)     | $(M^*-M^*)_S^L$ | $(M^*-M^*)_S^R$ | $(M^*-M)_S^L$ | $(M-M^*)_S^R$ | $(M^*-M^*)_S$ | $(M^*-M)_E^L$ | $(M-M^*)_E^R$ | $(M^*-M^*)_E$ |
|---------------------|-----------------|-----------------|---------------|---------------|---------------|---------------|---------------|---------------|
| Sc <sub>2</sub> -TV | -1.70           | -1.45           | -0.52         | /             | /             | /             | /             | /             |
| Ti <sub>2</sub> -TV | -1.92           | -1.67           | -0.73         | /             | /             | /             | /             | /             |
| V <sub>2</sub> -TV  | /               | /               | /             | /             | -0.08         | /             | -0.21         | /             |
| Cr <sub>2</sub> -TV | /               | -0.22           | /             | -0.30         | /             | -0.12         | -0.55         | /             |
| Ni <sub>2</sub> -TV | /               | /               | /             | /             | /             | /             | -0.84         | /             |
| Cu <sub>2</sub> -TV | /               | /               | /             | -0.39         | /             | /             | -0.83         | /             |
| Y <sub>2</sub> -TV  | -1.10           | -1.24           | /             | -0.35         | /             | /             | -0.28         | /             |
| Zr <sub>2</sub> -TV | -2.79           | -2.95           | /             | -1.82         | /             | /             | /             | /             |
| Nb <sub>2</sub> -TV | /               | -1.41           | /             | -0.58         | /             | /             | -0.96         | /             |
| Mo <sub>2</sub> -TV | -0.07           | /               | -0.29         | /             | /             | /             | -0.40         | /             |
| Tc <sub>2</sub> -TV | /               | /               | /             | /             | /             | -0.34         | /             | /             |
| Ru <sub>2</sub> -TV | /               | /               | /             | -0.49         | /             | /             | -0.91         | 0.45          |
| Rh <sub>2</sub> -TV | /               | /               | -0.25         | /             | /             | -0.94         | /             | /             |
| Pd <sub>2</sub> -TV | /               | /               | -0.54         | /             | /             | -0.86         | /             | /             |
| Lu <sub>2</sub> -TV | -0.72           | -0.54           | 0.13          | /             | /             | 0.08          | /             | /             |
| Hf <sub>2</sub> -TV | -1.95           | -1.70           | -0.95         | /             | /             | -0.88         | /             | /             |
| Ta <sub>2</sub> -TV | -2.08           | -2.40           | /             | /             | /             | -0.57         | /             | /             |
| W <sub>2</sub> -TV  | -1.52           | -1.30           | /             | /             | /             | -1.01         | -0.79         | /             |
| Re <sub>2</sub> -TV | /               | /               | /             | /             | -0.11         | -0.40         | /             | /             |
| Os <sub>2</sub> -TV | 0.68            | /               | -0.62         | /             | /             | -1.32         | /             | /             |
| Ir <sub>2</sub> -TV | /               | /               | /             | -0.62         | /             | /             | -1.00         | /             |
| Pt <sub>2</sub> -TV | /               | /               | -0.90         | /             | /             | -1.44         | /             | /             |

**Notes:** / means that the configuration of the N<sub>2</sub> adsorption doesn't exist. An asterisk \* denotes the active site on the surface of catalysts that the adsorbed N<sub>2</sub> connected to. The M means the transition metal atom (3d, 4d and 5d series). The subscripts E and S represent the end-on and side-on configurations, respectively. The superscripts L and R mean that adsorbed N<sub>2</sub> molecules are closer to the left and right sides of M<sub>2</sub>, respectively.

**Table S4.** The N–N bond lengths of N<sub>2</sub> adsorption on M<sub>2</sub>-TV series.

| Bond of length (Å)  | (M*-M*) <sub>S</sub> <sup>L</sup> | (M*-M*) <sub>S</sub> <sup>R</sup> | (M*-M) <sub>S</sub> <sup>L</sup> | (M-M*) <sub>S</sub> <sup>R</sup> | (M*-M*) <sub>S</sub> | (M*-M) <sub>E</sub> <sup>L</sup> | (M-M*) <sub>E</sub> <sup>R</sup> | (M*-M*) <sub>E</sub> |
|---------------------|-----------------------------------|-----------------------------------|----------------------------------|----------------------------------|----------------------|----------------------------------|----------------------------------|----------------------|
| Sc <sub>2</sub> -TV | 1.224                             | 1.216                             | 1.173                            | /                                | /                    | /                                | /                                | /                    |
| Ti <sub>2</sub> -TV | 1.247                             | 1.260                             | 1.189                            | /                                | /                    | /                                | /                                | /                    |
| V <sub>2</sub> -TV  | /                                 | /                                 | /                                | /                                | 1.215                | /                                | 1.139                            | /                    |
| Cr <sub>2</sub> -TV | /                                 | 1.213                             | /                                | 1.18                             | /                    | 1.144                            | 1.135                            | /                    |
| Ni <sub>2</sub> -TV | /                                 | /                                 | /                                | /                                | /                    | /                                | 1.138                            | /                    |
| Cu <sub>2</sub> -TV | /                                 | /                                 | /                                | 1.152                            | /                    | /                                | 1.131                            | /                    |
| Y <sub>2</sub> -TV  | 1.216                             | 1.225                             | /                                | 1.175                            | /                    | /                                | 1.143                            | /                    |
| Zr <sub>2</sub> -TV | 1.272                             | 1.267                             | /                                | 1.188                            | /                    | /                                | /                                | /                    |
| Nb <sub>2</sub> -TV | /                                 | 1.283                             | /                                | 1.180                            | /                    | /                                | 1.145                            | /                    |
| Mo <sub>2</sub> -TV | 1.239                             | /                                 | 1.156                            | /                                | /                    | /                                | 1.133                            | /                    |
| Tc <sub>2</sub> -TV | /                                 | /                                 | /                                | /                                | /                    | 1.138                            | /                                | /                    |
| Ru <sub>2</sub> -TV | /                                 | /                                 | /                                | 1.187                            | /                    | /                                | 1.139                            | 1.178                |
| Rh <sub>2</sub> -TV | /                                 | /                                 | 1.160                            | /                                | /                    | 1.133                            | /                                | /                    |
| Pd <sub>2</sub> -TV | /                                 | /                                 | 1.159                            | /                                | /                    | 1.130                            | /                                | /                    |
| Lu <sub>2</sub> -TV | 1.236                             | 1.225                             | 1.184                            | /                                | /                    | 1.135                            | /                                | /                    |
| Hf <sub>2</sub> -TV | 1.284                             | 1.279                             | 1.197                            | /                                | /                    | 1.152                            | /                                | /                    |
| Ta <sub>2</sub> -TV | 1.258                             | 1.299                             | /                                | /                                | /                    | 1.143                            | /                                | /                    |
| W <sub>2</sub> -TV  | 1.346                             | 1.300                             | /                                | /                                | /                    | 1.146                            | 1.147                            | /                    |
| Re <sub>2</sub> -TV | /                                 | /                                 | /                                | /                                | 1.259                | 1.145                            | /                                | /                    |
| Os <sub>2</sub> -TV | 1.244                             | /                                 | 1.195                            | /                                | /                    | 1.142                            | /                                | /                    |
| Ir <sub>2</sub> -TV | /                                 | /                                 | /                                | 1.183                            | /                    | /                                | 1.138                            | /                    |
| Pt <sub>2</sub> -TV | /                                 | /                                 | 1.182                            | /                                | /                    | 1.133                            | /                                | /                    |

**Notes:** / means that the configuration of the N<sub>2</sub> adsorption doesn't exist. An asterisk \* denotes the active site on the surface of catalysts that the adsorbed N<sub>2</sub> connected to. The M means the transition metal atom (3d, 4d and 5d). The subscripts E and S represent the end-on and side-on configurations, respectively. The superscripts L and R mean that adsorbed N<sub>2</sub> molecules are closer to the left and right sides of M<sub>2</sub>, respectively.

**Table S5.** Gibbs free energy changes of N<sub>2</sub> adsorption on M<sub>2</sub>-QV series.

| $\Delta G$ (eV)     | (M*-M*) <sub>S</sub> <sup>L</sup> | (M*-M*) <sub>S</sub> <sup>R</sup> | (M*-M*) <sub>S</sub> | (M*-M) <sub>E</sub> <sup>L</sup> | (M-M*) <sub>E</sub> <sup>R</sup> | (M*-M*) <sub>E</sub> |
|---------------------|-----------------------------------|-----------------------------------|----------------------|----------------------------------|----------------------------------|----------------------|
| V <sub>2</sub> -QV  | /                                 | -0.33                             | /                    | /                                | 0.20                             | /                    |
| Cr <sub>2</sub> -QV | 0.29                              | /                                 | /                    | -0.27                            | /                                | /                    |
| Mn <sub>2</sub> -QV | /                                 | /                                 | 0.41                 | -0.63                            | /                                | /                    |
| Fe <sub>2</sub> -QV | /                                 | /                                 | /                    | /                                | -0.20                            | -0.10                |
| Co <sub>2</sub> -QV | /                                 | /                                 | 0.26                 | /                                | /                                | -0.32                |
| Y <sub>2</sub> -QV  | /                                 | -1.23                             | /                    | /                                | /                                | /                    |
| Nb <sub>2</sub> -QV | -2.04                             | /                                 | /                    | /                                | /                                | /                    |
| Mo <sub>2</sub> -QV | /                                 | /                                 | /                    | 0.19                             | 0.10                             | /                    |
| Tc <sub>2</sub> -QV | /                                 | /                                 | /                    | 0.01                             | 0.01                             | /                    |
| Lu <sub>2</sub> -QV | -0.76                             | /                                 | /                    | /                                | 0.07                             | /                    |
| Hf <sub>2</sub> -QV | /                                 | -2.13                             | /                    | /                                | /                                | /                    |
| Ta <sub>2</sub> -QV | -2.59                             | /                                 | /                    | /                                | /                                | /                    |
| W <sub>2</sub> -QV  | /                                 | -2.00                             | /                    | /                                | -1.15                            | /                    |

**Notes:** / means that the configuration of the N<sub>2</sub> adsorption doesn't exist. An asterisk \* denotes the active site on the surface of catalysts that the adsorbed N<sub>2</sub> connected to. The M means the transition metal atom (3d, 4d and 5d series). The subscripts E and S represent the end-on and side-on configurations, respectively. The superscripts L and R mean that adsorbed N<sub>2</sub> molecules are closer to the left and right sides of M<sub>2</sub>, respectively.

**Table S6.** The N–N bond lengths of N<sub>2</sub> adsorption on M<sub>2</sub>-QV series.

| Bond of length (Å)  | (M*-M*) <sub>S</sub> <sup>L</sup> | (M*-M*) <sub>S</sub> <sup>R</sup> | (M*-M*) <sub>S</sub> | (M*-M) <sub>E</sub> <sup>L</sup> | (M-M*) <sub>E</sub> <sup>R</sup> | (M*-M*) <sub>E</sub> |
|---------------------|-----------------------------------|-----------------------------------|----------------------|----------------------------------|----------------------------------|----------------------|
| V <sub>2</sub> -QV  | /                                 | 1.240                             | /                    | /                                | 1.136                            | /                    |
| Cr <sub>2</sub> -QV | 1.227                             | /                                 | /                    | 1.141                            | /                                | /                    |
| Mn <sub>2</sub> -QV | /                                 | /                                 | 1.197                | 1.184                            | /                                | /                    |
| Fe <sub>2</sub> -QV | /                                 | /                                 | /                    | /                                | 1.140                            | 1.159                |
| Co <sub>2</sub> -QV | /                                 | /                                 | 1.166                | /                                | /                                | 1.156                |
| Y <sub>2</sub> -QV  | /                                 | 1.212                             | /                    | /                                | /                                | /                    |
| Nb <sub>2</sub> -QV | 1.259                             | /                                 | /                    | /                                | /                                | /                    |
| Mo <sub>2</sub> -QV | /                                 | /                                 | /                    | 1.135                            | 1.126                            | /                    |
| Tc <sub>2</sub> -QV | /                                 | /                                 | /                    | 1.128                            | 1.127                            | /                    |
| Lu <sub>2</sub> -QV | 1.217                             | /                                 | /                    | /                                | 1.137                            | /                    |
| Hf <sub>2</sub> -QV | /                                 | 1.255                             | /                    | /                                | /                                | /                    |
| Ta <sub>2</sub> -QV | 1.283                             | /                                 | /                    | /                                | /                                | /                    |
| W <sub>2</sub> -QV  | /                                 | 1.298                             | /                    | /                                | 1.173                            | /                    |

**Notes:** / means that the configuration of the N<sub>2</sub> adsorption doesn't exist. An asterisk \* denotes the active site on the surface of catalysts that the adsorbed N<sub>2</sub> connected to. The M means the transition metal atom (3d, 4d and 5d series). The subscripts E and S represent the end-on and side-on configurations, respectively. The superscripts L and R mean that adsorbed N<sub>2</sub> molecules are closer to the left and right sides of M<sub>2</sub>, respectively.

| $\Delta G$ (eV)     | $(M^*-M^*)_S^L$ -a | $(M^*-M^*)_S^L$ -b | $(M^*-M^*)_S^R$ -a | $(M^*-M^*)_S^R$ -b | $(M^*-M)_S^L$ -a | $(M^*-M)_S^L$ -b | $(M-M^*)_S^R$ -a | $(M-M^*)_S^R$ -b | $(M^*-M^*)_S$ | $(M^*-M)_E^L$ -c | $(M-M^*)_E^R$ -c |
|---------------------|--------------------|--------------------|--------------------|--------------------|------------------|------------------|------------------|------------------|---------------|------------------|------------------|
| Sc <sub>2</sub> -DV | -0.14              | 0.85               | /                  | /                  | /                | /                | /                | /                | /             | /                | /                |
| Ti <sub>2</sub> -DV | 0.10               | 0.91               | /                  | /                  | /                | /                | /                | /                | /             | /                | /                |
| V <sub>2</sub> -DV  | 0.37               | 0.08               | /                  | /                  | /                | /                | /                | /                | /             | /                | /                |
| Cr <sub>2</sub> -DV | /                  | /                  | 0.51               | 0.38               | /                | /                | /                | /                | /             | 0.69             | /                |
| Mn <sub>2</sub> -DV | 0.30               | 0.36               | /                  | /                  | /                | /                | /                | /                | /             | 0.44             | 0.32             |
| Fe <sub>2</sub> -DV | 0.50               | 0.48               | /                  | /                  | /                | /                | /                | /                | 0.47          | 0.92             | /                |
| Co <sub>2</sub> -DV | /                  | /                  | /                  | /                  | /                | /                | /                | /                | /             | 0.95             | /                |
| Ni <sub>2</sub> -DV | /                  | /                  | /                  | /                  | /                | /                | /                | /                | /             | 0.64             | /                |
| Y <sub>2</sub> -DV  | -0.30              | 0.72               | /                  | /                  | /                | /                | /                | /                | /             | /                | /                |
| Zr <sub>2</sub> -DV | /                  | /                  | 0.20               | -0.10              | /                | /                | /                | /                | /             | /                | /                |
| Nb <sub>2</sub> -DV | 0.02               | 0.55               | /                  | /                  | /                | /                | /                | /                | /             | /                | /                |
| Mo <sub>2</sub> -DV | -0.05              | -0.11              | /                  | /                  | /                | /                | /                | /                | /             | -0.06            | /                |
| Tc <sub>2</sub> -DV | /                  | /                  | /                  | /                  | /                | /                | /                | /                | /             | 1.10             | /                |
| Ru <sub>2</sub> -DV | /                  | /                  | /                  | /                  | /                | /                | 0.77             | 0.89             | /             | /                | 1.06             |
| Rh <sub>2</sub> -DV | /                  | /                  | /                  | /                  | 0.87             | 0.95             | /                | /                | /             | 1.34             | /                |
| Pd <sub>2</sub> -DV | /                  | /                  | /                  | /                  | /                | /                | /                | /                | /             | 0.99             | /                |
| Ag <sub>2</sub> -DV | /                  | /                  | /                  | /                  | /                | /                | /                | /                | /             | 1.71             | /                |
| Lu <sub>2</sub> -DV | -0.38              | 0.68               | /                  | /                  | /                | /                | /                | /                | /             | -1.06            | /                |
| Hf <sub>2</sub> -DV | -0.43              | 0.12               | /                  | /                  | /                | /                | /                | /                | /             | -2.07            | /                |
| Ta <sub>2</sub> -DV | /                  | /                  | 0.60               | -0.24              | /                | /                | /                | /                | /             | /                | /                |
| W <sub>2</sub> -DV  | -0.31              | -1.63              | /                  | /                  | /                | /                | /                | /                | /             | -0.23            | /                |
| Re <sub>2</sub> -DV | -0.35              | -0.49              | /                  | /                  | /                | /                | 0.86             | 0.38             | /             | 0.43             | /                |
| Os <sub>2</sub> -DV | /                  | /                  | /                  | /                  | /                | /                | /                | /                | -0.36         | 0.46             | /                |
| Ir <sub>2</sub> -DV | /                  | /                  | /                  | /                  | /                | /                | /                | /                | /             | 1.03             | /                |

**Table S7.** Gibbs free energy changes of the first protonation step for M<sub>2</sub>-DV series.



**Notes:** / means that the configuration of the first protonation step doesn't exist. An asterisk \* denotes the active site on the surface of catalysts that the adsorbed N<sub>2</sub> is connected to. The M means the transition metal atom (3d, 4d and 5d series). The subscripts E and S represent the end-on and side-on configurations, respectively. The superscripts L and R mean that adsorbed N<sub>2</sub> molecules are closer to the left and right sides of M<sub>2</sub>, respectively. -a and -b mean that the first proton-electron pair attacks different N atoms of adsorbed N<sub>2</sub> molecule for side-on configuration, -c shows that the first proton-electron pair attacks the distal N atom of adsorbed N<sub>2</sub> molecule for end-on configuration.

**Table S8.** Gibbs free energy changes of the last (sixth) protonation step for M<sub>2</sub>-DV series.

| $\Delta G$ (eV)     | C-S  | S <sub>1</sub> -S <sub>1</sub> | S <sub>2</sub> -S <sub>2</sub> |
|---------------------|------|--------------------------------|--------------------------------|
| Sc <sub>2</sub> -DV | 1.34 | /                              | /                              |
| Ti <sub>2</sub> -DV | 1.34 | /                              | /                              |
| V <sub>2</sub> -DV  | 1.32 | /                              | /                              |
| Cr <sub>2</sub> -DV | 1.07 | 0.42                           | /                              |
| Mn <sub>2</sub> -DV | 0.63 | -0.34                          | /                              |
| Fe <sub>2</sub> -DV | 0.90 | /                              | /                              |
| Co <sub>2</sub> -DV | /    | /                              | /                              |
| Ni <sub>2</sub> -DV | /    | /                              | /                              |
| Y <sub>2</sub> -DV  | 1.76 | /                              | /                              |
| Zr <sub>2</sub> -DV | 1.53 | 1.03                           | /                              |
| Nb <sub>2</sub> -DV | 1.55 | /                              | /                              |
| Mo <sub>2</sub> -DV | 1.24 | 0.33                           | /                              |
| Tc <sub>2</sub> -DV | /    | /                              | /                              |
| Ru <sub>2</sub> -DV | /    | /                              | /                              |
| Rh <sub>2</sub> -DV | /    | /                              | /                              |
| Pd <sub>2</sub> -DV | /    | /                              | /                              |
| Ag <sub>2</sub> -DV | /    | /                              | /                              |
| Lu <sub>2</sub> -DV | 1.22 | 0.33                           | /                              |
| Hf <sub>2</sub> -DV | /    | /                              | /                              |
| Ta <sub>2</sub> -DV | 1.10 | 0.91                           | /                              |
| W <sub>2</sub> -DV  | 2.07 | 0.56                           | /                              |
| Re <sub>2</sub> -DV | 0.67 | /                              | /                              |
| Os <sub>2</sub> -DV | 0.95 | 0.34                           | 0.47                           |
| Ir <sub>2</sub> -DV | /    | /                              | /                              |

**Notes:** / means that the configuration of the last protonation step doesn't exist. C and S mean that the adsorbates are located in the center and side of M<sub>2</sub>. When adsorbates have two different configurations in two transition metal atoms, S<sub>1</sub> and S<sub>2</sub> are used to distinguish them.



**Table S9.** Gibbs free energy changes of the first protonation step for M<sub>2</sub>-TV series

| $\Delta G$ (eV)     | (M*-M*) <sub>S</sub> <sup>L</sup> -a | (M*-M*) <sub>S</sub> <sup>L</sup> -b | (M*-M*) <sub>S</sub> <sup>R</sup> -a | (M*-M*) <sub>S</sub> <sup>R</sup> -b | (M*-M*) <sub>S</sub> <sup>L</sup> -a | (M*-M*) <sub>S</sub> <sup>L</sup> -b | (M*-M*) <sub>S</sub> <sup>R</sup> -a | (M*-M*) <sub>S</sub> <sup>R</sup> -b | (M*-M*) <sub>S</sub> -a | (M*-M*) <sub>S</sub> -b | (M*-M*) <sub>E</sub> <sup>L</sup> -c | (M*-M*) <sub>E</sub> <sup>R</sup> -c |
|---------------------|--------------------------------------|--------------------------------------|--------------------------------------|--------------------------------------|--------------------------------------|--------------------------------------|--------------------------------------|--------------------------------------|-------------------------|-------------------------|--------------------------------------|--------------------------------------|
| Sc <sub>2</sub> -TV | /                                    | /                                    | -0.18                                | 0.15                                 | 0.31                                 | -0.30                                | -1.37                                | /                                    | /                       | /                       | /                                    | /                                    |
| Ti <sub>2</sub> -TV | /                                    | /                                    | 0.04                                 | 0.28                                 | 0.09                                 | -0.09                                | 0.34                                 | 0.44                                 | /                       | /                       | /                                    | /                                    |
| V <sub>2</sub> -TV  | /                                    | /                                    | /                                    | /                                    | /                                    | /                                    | /                                    | /                                    | -0.62                   | -0.50                   | /                                    | 0.47                                 |
| Cr <sub>2</sub> -TV | /                                    | /                                    | /                                    | /                                    | 0.55                                 | 0.29                                 | /                                    | /                                    | 0.76                    | 1.04                    | 0.14                                 | 0.97                                 |
| Ni <sub>2</sub> -TV | /                                    | /                                    | /                                    | /                                    | /                                    | /                                    | /                                    | /                                    | /                       | /                       | 1.20                                 | /                                    |
| Cu <sub>2</sub> -TV | /                                    | /                                    | /                                    | /                                    | /                                    | /                                    | 1.64                                 | 1.68                                 | /                       | /                       | 1.62                                 | /                                    |
| Y <sub>2</sub> -TV  | -0.40                                | 0.84                                 | -0.17                                | -0.32                                | /                                    | /                                    | 0.32                                 | 0.35                                 | /                       | /                       | /                                    | 0.70                                 |
| Zr <sub>2</sub> -TV | -0.25                                | 0.07                                 | 0.14                                 | -0.28                                | /                                    | /                                    | 0.01                                 | /                                    | /                       | /                       | /                                    | /                                    |
| Nb <sub>2</sub> -TV | /                                    | /                                    | 0.02                                 | -0.11                                | /                                    | /                                    | 0.48                                 | 0.29                                 | /                       | /                       | /                                    | 0.39                                 |
| Mo <sub>2</sub> -TV | 0.19                                 | 0.08                                 | /                                    | /                                    | 1.00                                 | 0.18                                 | /                                    | /                                    | /                       | /                       | /                                    | 0.41                                 |
| Tc <sub>2</sub> -TV | /                                    | /                                    | /                                    | /                                    | /                                    | /                                    | /                                    | /                                    | /                       | /                       | 0.94                                 | /                                    |
| Ru <sub>2</sub> -TV | /                                    | /                                    | /                                    | /                                    | /                                    | /                                    | 0.52                                 | 0.55                                 | /                       | /                       | /                                    | 0.91                                 |
| Rh <sub>2</sub> -TV | /                                    | /                                    | /                                    | /                                    | 0.44                                 | 0.43                                 | /                                    | /                                    | /                       | /                       | 1.03                                 | /                                    |
| Pd <sub>2</sub> -TV | /                                    | /                                    | /                                    | /                                    | 1.48                                 | 1.53                                 | /                                    | /                                    | /                       | /                       | 1.57                                 | /                                    |
| Lu <sub>2</sub> -TV | -0.41                                | -0.02                                | 0.80                                 | -0.49                                | /                                    | /                                    | /                                    | /                                    | /                       | /                       | /                                    | /                                    |
| Hf <sub>2</sub> -TV | -0.42                                | 0.77                                 | -0.05                                | -0.49                                | -0.03                                | /                                    | /                                    | /                                    | /                       | /                       | 0.45                                 | /                                    |
| Ta <sub>2</sub> -TV | -0.25                                | 0.44                                 | 0.69                                 | 0.05                                 | /                                    | /                                    | /                                    | /                                    | /                       | /                       | -1.80                                | /                                    |
| W <sub>2</sub> -TV  | 0.60                                 | 0.32                                 | -0.02                                | 0.45                                 | /                                    | /                                    | /                                    | /                                    | /                       | /                       | 0.58                                 | 0.23                                 |
| Re <sub>2</sub> -TV | /                                    | /                                    | /                                    | /                                    | /                                    | /                                    | /                                    | /                                    | -0.17                   | -0.59                   | 0.60                                 | /                                    |
| Os <sub>2</sub> -TV | /                                    | /                                    | /                                    | /                                    | 0.46                                 | 0.58                                 | /                                    | /                                    | /                       | /                       | 0.68                                 | /                                    |
| Ir <sub>2</sub> -TV | /                                    | /                                    | /                                    | /                                    | /                                    | /                                    | 0.40                                 | 0.39                                 | /                       | /                       | /                                    | 0.54                                 |
| Pt <sub>2</sub> -TV | /                                    | /                                    | /                                    | /                                    | 1.20                                 | 1.21                                 | /                                    | /                                    | /                       | /                       | 1.48                                 | /                                    |

**Notes:** / means that the configuration of the first protonation step doesn't exist. \* denotes the active site on the surface of catalysts that the adsorbed N<sub>2</sub> connected to. The M means the transition metal atom (3d, 4d and 5d series). The subscripts E and S represent the end-on and side-on configurations, respectively. The superscripts L and R mean that adsorbed N<sub>2</sub> molecules are closer to the left and right sides of M<sub>2</sub>, respectively. -a and -b mean that the first proton-electron pair attacks different N atom of adsorbed N<sub>2</sub> molecule for side-on configuration, -c shows that the first proton-electron pair attacks distal N atom of adsorbed N<sub>2</sub> molecule for end-on configuration.

**Table S10.** Gibbs free energy changes of the last (sixth) protonation step for M<sub>2</sub>-TV series.

| $\Delta G$ (eV)     | C-S  | C-S <sub>1</sub> | C-S <sub>2</sub> | S <sub>1</sub> -S <sub>1</sub> | S <sub>2</sub> -S <sub>2</sub> |
|---------------------|------|------------------|------------------|--------------------------------|--------------------------------|
| Sc <sub>2</sub> -TV | 1.76 | /                | /                | 0.52                           | /                              |
| Ti <sub>2</sub> -TV | /    | 1.58             | /                | /                              | 1.23                           |
| V <sub>2</sub> -TV  | /    | 0.40             | /                | -0.18                          | /                              |
| Cr <sub>2</sub> -TV | /    | 0.79             | 0.24             | /                              | /                              |
| Ni <sub>2</sub> -TV | /    | /                | /                | /                              | /                              |
| Cu <sub>2</sub> -TV | /    | /                | /                | /                              | /                              |
| Y <sub>2</sub> -TV  | /    | 1.31             | /                | /                              | 0.62                           |
| Zr <sub>2</sub> -TV | /    | 1.25             | /                | /                              | /                              |
| Nb <sub>2</sub> -TV | /    | 1.36             | /                | /                              | 0.82                           |
| Mo <sub>2</sub> -TV | /    | 0.40             | /                | -0.03                          | /                              |
| Tc <sub>2</sub> -TV | /    | /                | /                | /                              | /                              |
| Ru <sub>2</sub> -TV | /    | /                | /                | /                              | /                              |
| Rh <sub>2</sub> -TV | /    | -1.04            | /                | -0.18                          | /                              |
| Pd <sub>2</sub> -TV | /    | /                | /                | /                              | /                              |
| Lu <sub>2</sub> -TV | /    | 1.06             | /                | 0.37                           | /                              |
| Hf <sub>2</sub> -TV | /    | /                | /                | 1.12                           | /                              |
| Ta <sub>2</sub> -TV | /    | /                | /                | 0.84                           | /                              |
| W <sub>2</sub> -TV  | /    | /                | /                | 0.83                           | 0.70                           |
| Re <sub>2</sub> -TV | /    | /                | /                | 0.47                           | /                              |
| Os <sub>2</sub> -TV | /    | /                | /                | /                              | /                              |
| Ir <sub>2</sub> -TV | /    | /                | /                | 0.24                           | /                              |
| Pt <sub>2</sub> -TV | /    | /                | /                | /                              | /                              |

**Notes:** / means that the configuration of the last protonation step doesn't exist. C and S mean that the adsorbates are located in the center and side of M<sub>2</sub>. When adsorbates have two different configurations in two transition metal atoms, S<sub>1</sub> and S<sub>2</sub> are used to distinguish them.

**Table S11.** Gibbs free energy changes of the first protonation step for M<sub>2</sub>-QV series.

| $\Delta G$ (eV)     | (M*-M*) <sub>S</sub> <sup>L</sup> -a | (M*-M*) <sub>S</sub> <sup>L</sup> -b | (M*-M*) <sub>S</sub> <sup>R</sup> -a | (M*-M*) <sub>S</sub> <sup>R</sup> -b | (M*-M*) <sub>E</sub> -c | (M*-M*) <sub>E</sub> <sup>L</sup> -c | (M*-M*) <sub>E</sub> <sup>R</sup> -c |
|---------------------|--------------------------------------|--------------------------------------|--------------------------------------|--------------------------------------|-------------------------|--------------------------------------|--------------------------------------|
| V <sub>2</sub> -QV  | /                                    | /                                    | 0.53                                 | 0.17                                 | /                       | /                                    | /                                    |
| Cr <sub>2</sub> -QV | /                                    | /                                    | /                                    | /                                    | /                       | 0.34                                 | /                                    |
| Mn <sub>2</sub> -QV | /                                    | /                                    | /                                    | /                                    | /                       | 0.35                                 | /                                    |
| Fe <sub>2</sub> -QV | /                                    | /                                    | /                                    | /                                    | 0.28                    | /                                    | 1.01                                 |
| Co <sub>2</sub> -QV | /                                    | /                                    | /                                    | /                                    | 0.45                    | /                                    | /                                    |
| Y <sub>2</sub> -QV  | /                                    | /                                    | 0.81                                 | -0.18                                | /                       | /                                    | /                                    |
| Nb <sub>2</sub> -QV | 0.06                                 | 0.91                                 | /                                    | /                                    | /                       | /                                    | /                                    |
| Lu <sub>2</sub> -QV | -0.26                                | 0.78                                 | /                                    | /                                    | /                       | /                                    | /                                    |
| Hf <sub>2</sub> -QV | /                                    | /                                    | 0.81                                 | -0.51                                | /                       | /                                    | /                                    |
| Ta <sub>2</sub> -QV | 0.00                                 | 0.80                                 | /                                    | /                                    | /                       | /                                    | /                                    |
| W <sub>2</sub> -QV  | /                                    | /                                    | 0.19                                 | 0.26                                 | /                       | /                                    | -0.32                                |

**Notes:** / means that the configuration of the first protonation step doesn't exist. \* denotes the active site on the surface of catalysts that the adsorbed N<sub>2</sub> connected to. The M means the transition metal atom (3d, 4d and 5d series). The subscripts E and S represent the end-on and side-on configurations, respectively. The

superscripts L and R mean that adsorbed N<sub>2</sub> molecules are closer to the left and right sides of M<sub>2</sub>, respectively. -a and -b mean that the first proton-electron pair attacks different N atom of adsorbed N<sub>2</sub> molecule for side-on configuration, -c shows that the first proton-electron pair attacks distal N atom of adsorbed N<sub>2</sub> molecule for end-on configuration.

**Table S12.** Gibbs free energy changes of the last (sixth) protonation step for M<sub>2</sub>-QV series.

| $\Delta G$ (eV)     | C-S   | S-S   |
|---------------------|-------|-------|
| V <sub>2</sub> -QV  | 0.64  | -0.19 |
| Cr <sub>2</sub> -QV | 0.91  | /     |
| Mn <sub>2</sub> -QV | 0.95  | /     |
| Fe <sub>2</sub> -QV | 0.42  | /     |
| Co <sub>2</sub> -QV | /     | /     |
| Y <sub>2</sub> -QV  | 1.26  | /     |
| Nb <sub>2</sub> -QV | /     | /     |
| Lu <sub>2</sub> -QV | 0.94  | /     |
| Hf <sub>2</sub> -QV | -0.43 | /     |
| Ta <sub>2</sub> -QV | 1.68  | 0.67  |
| W <sub>2</sub> -QV  | 0.88  | -0.12 |

**Notes:** / means that the configuration of the last protonation step doesn't exist. C and S mean that the adsorbates are located in the center and side of M<sub>2</sub>. The Nb<sub>2</sub>-QV catalyst can't adsorb \*NH<sub>2</sub>.

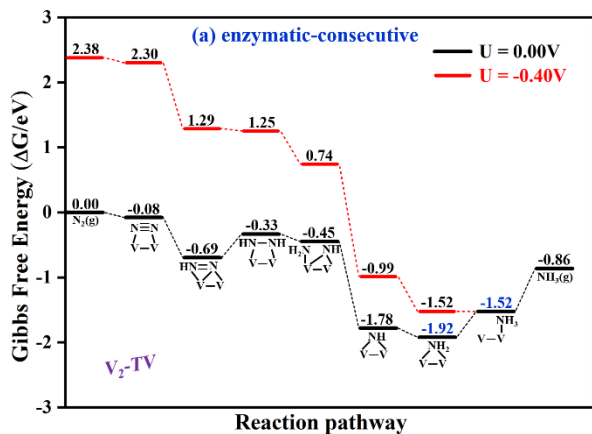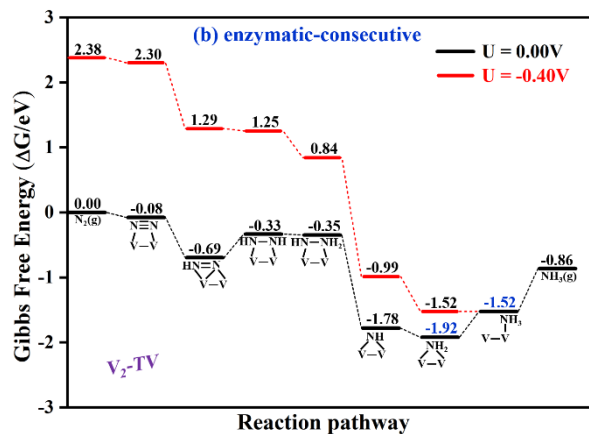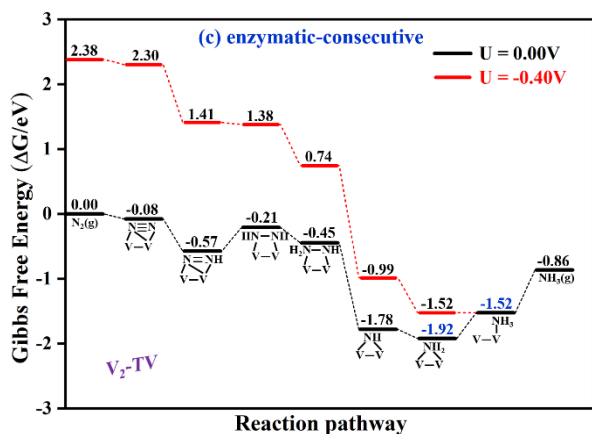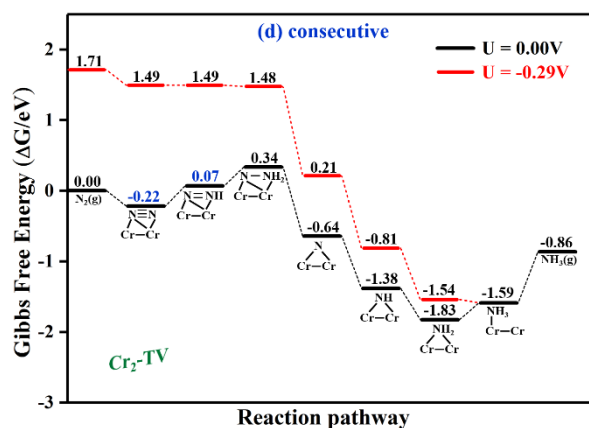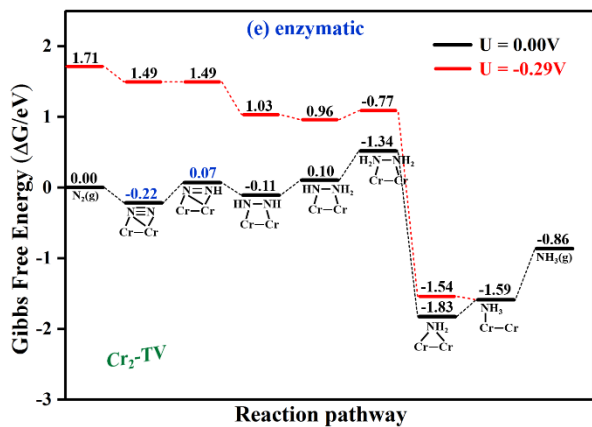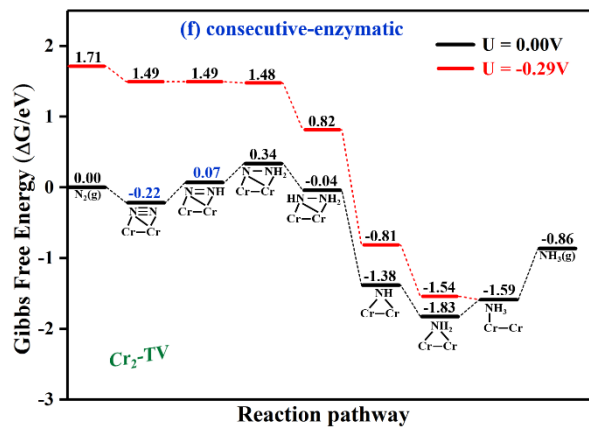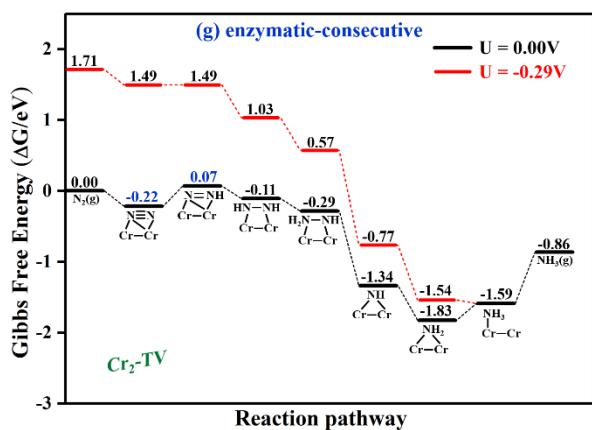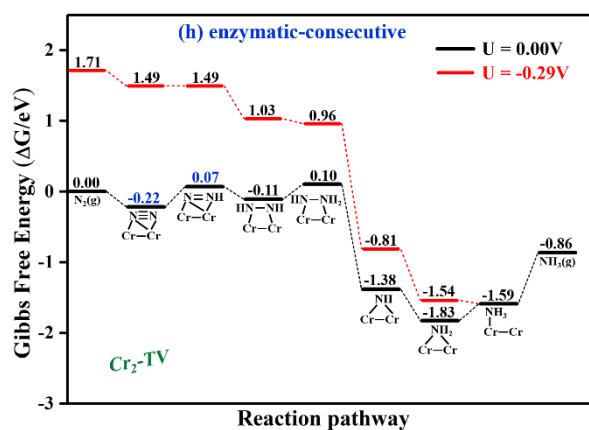



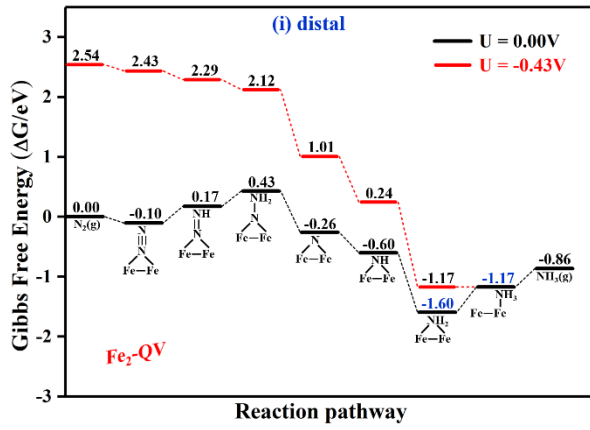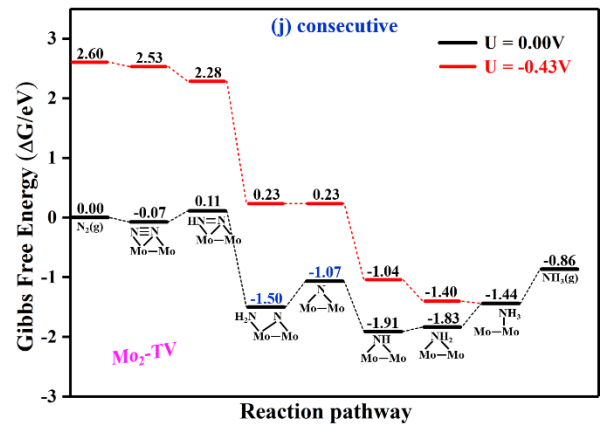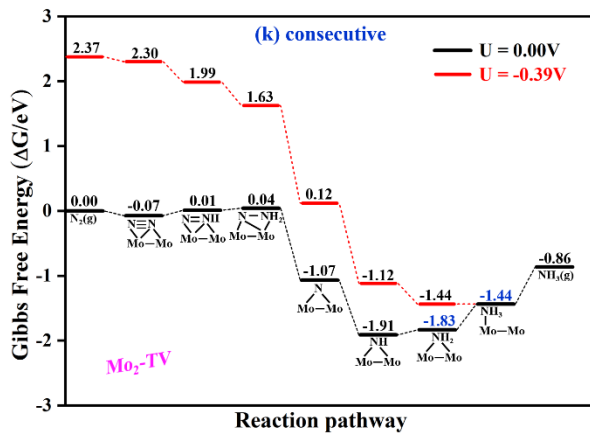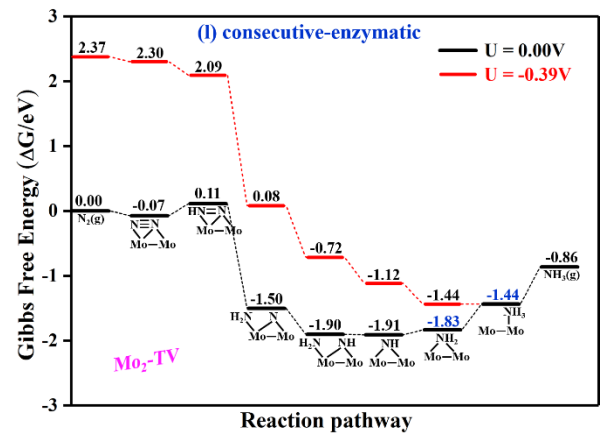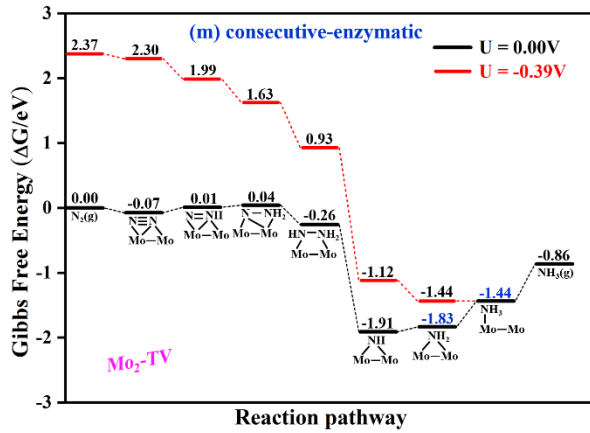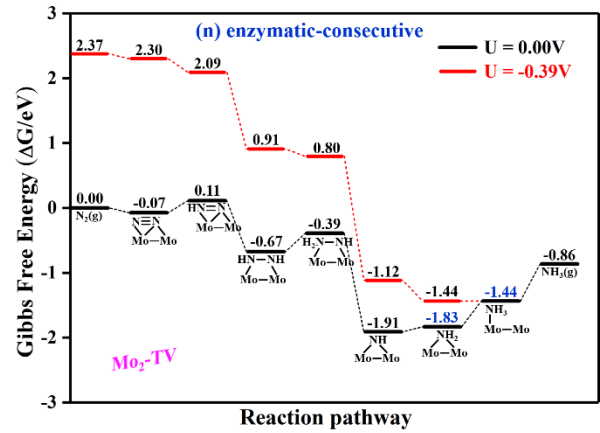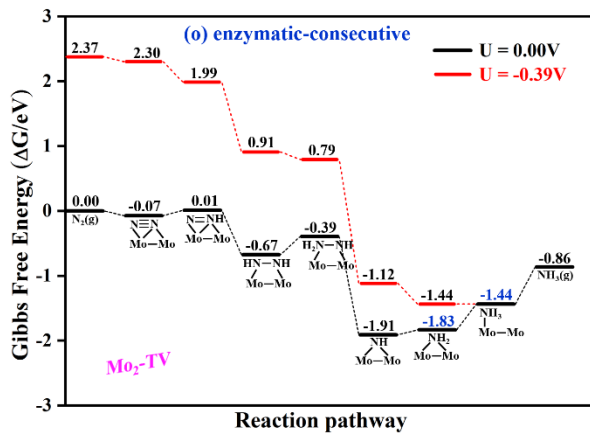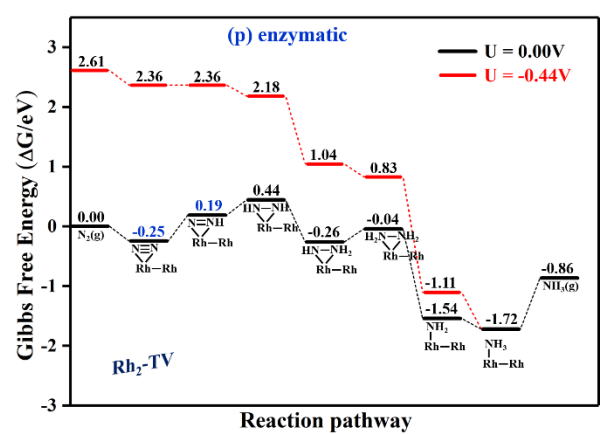

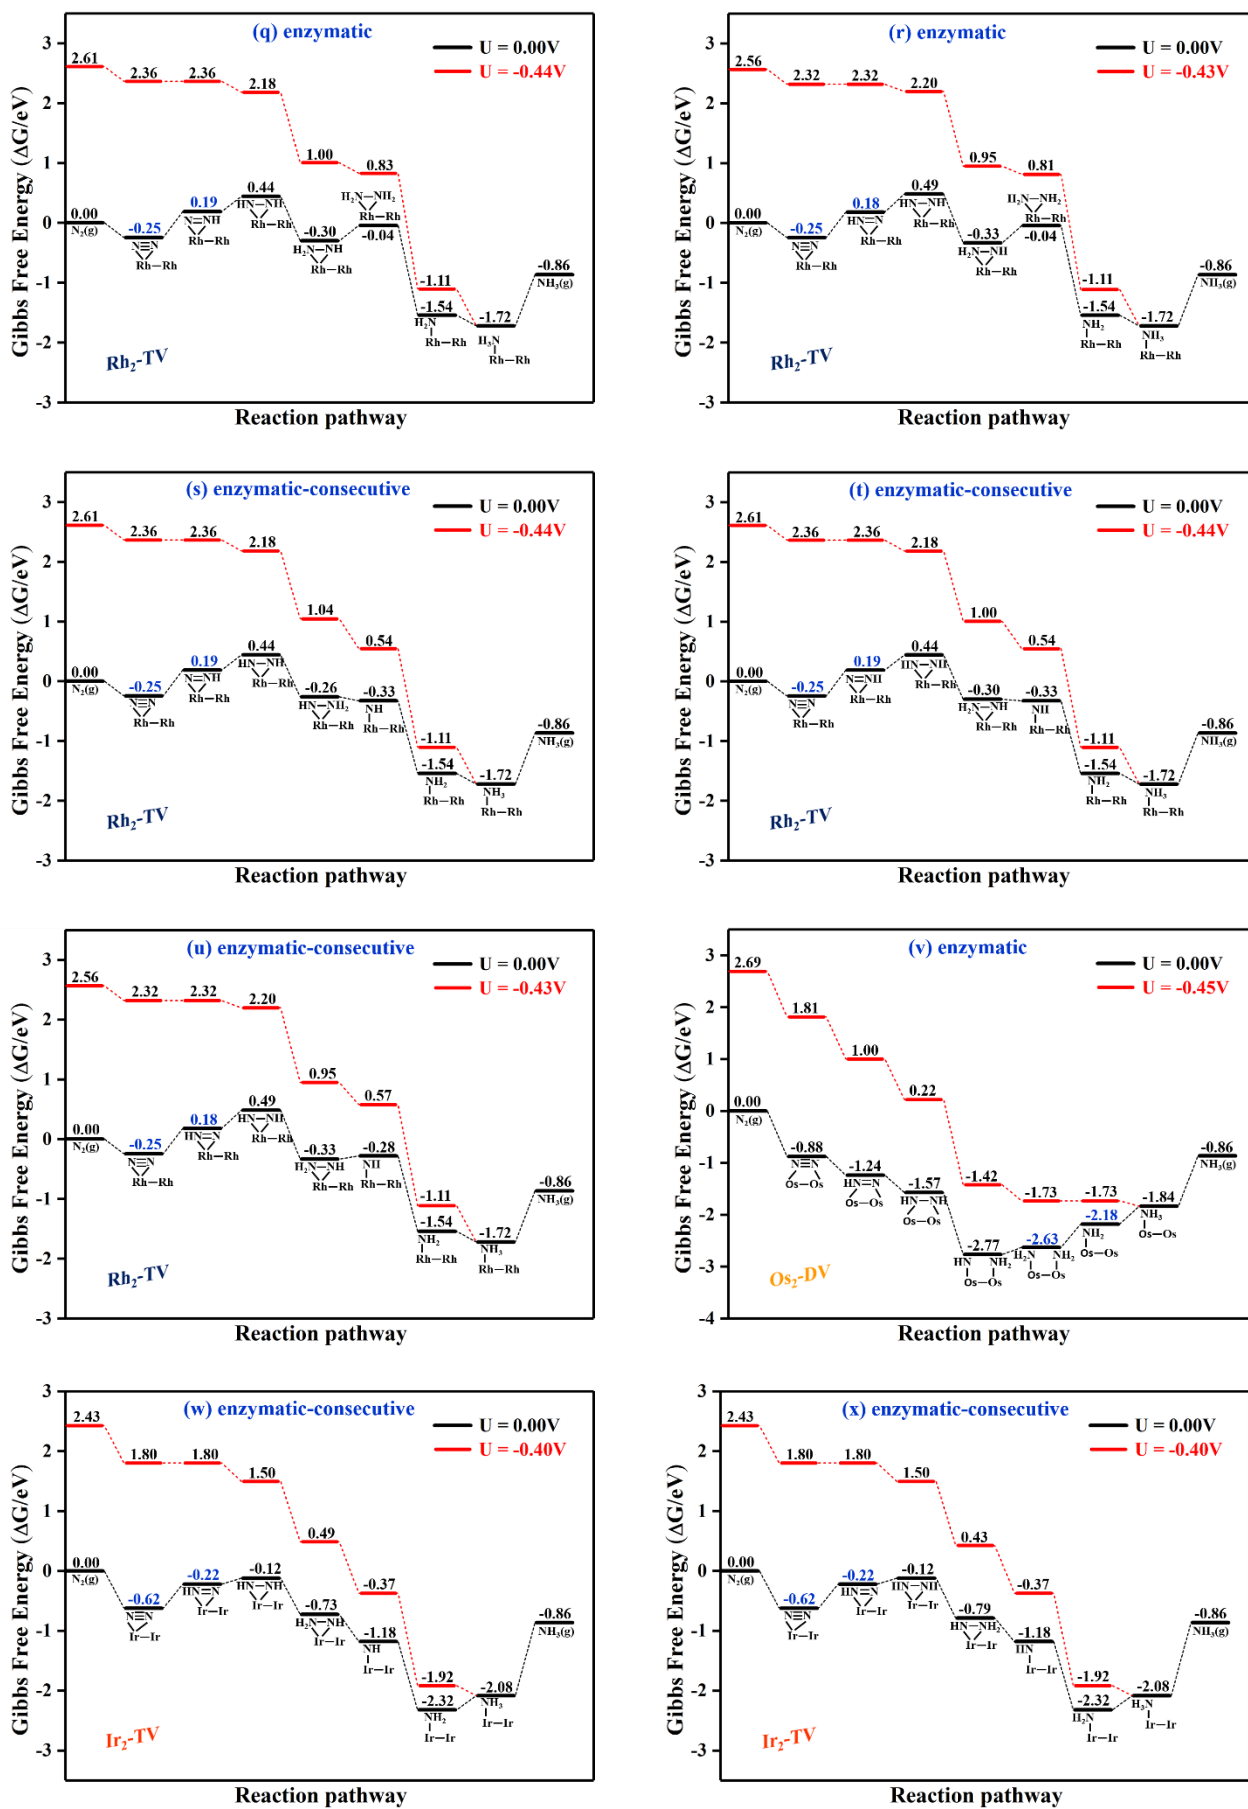

**Figure S1.** Gibbs free energy diagrams for NRR on  $V_2-TV$ ,  $Cr_2-TV$ ,  $Fe_2-QV$ ,  $Mo_2-TV$ ,  $Rh_2-TV$ ,  $Os_2-DV$  and  $Ir_2-TV$ .

**Table S13.** On Cr<sub>2</sub>-TV, Mo<sub>2</sub>-TV and Ir<sub>2</sub>-TV catalysts, the evolution length of N-N bond through eight different reaction pathways.

| catalyst       | Cr <sub>2</sub> -TV |                    | Mo <sub>2</sub> -TV |        |                       | Ir <sub>2</sub> -TV |                       |                       |
|----------------|---------------------|--------------------|---------------------|--------|-----------------------|---------------------|-----------------------|-----------------------|
|                | distal              | distal-alternating | consecutive         | distal | enzymatic-consecutive | consecutive         | enzymatic-consecutive | enzymatic-consecutive |
| N <sub>2</sub> | 1.144               | 1.144              | 1.114               | 1.114  | 1.114                 | 1.114               | 1.114                 | 1.114                 |
| first          | 1.252               | 1.252              | 1.156               | 1.133  | 1.239                 | 1.183               | 1.183                 | 1.183                 |
| second         | 1.331               | 1.331              | 1.364               | 1.262  | 1.337                 | 1.253               | 1.253                 | 1.253                 |
| third          | /                   | 1.444              | 1.459               | 1.356  | 1.410                 | 1.430               | 1.416                 | 1.416                 |

**Notes:** / means that the corresponding configuration doesn't exist. First, second and third means that they are first, second and third protonation step.

**Table S14.** Onset potential of NRR and the corresponding magnetic moment for Cr<sub>2</sub>-, Mo<sub>2</sub>-, Ir<sub>2</sub>-TV catalysts that meet four screening criterias.

| catalyst            | magnetic moment ( $\mu_B$ ) | onset potential (V) |
|---------------------|-----------------------------|---------------------|
| Cr <sub>2</sub> -TV | 0.53                        | 0.24                |
| Mo <sub>2</sub> -TV | 0.00                        | 0.39                |
| Ir <sub>2</sub> -TV | 0.00                        | 0.39                |

**Table S15.** The charge variations (the Bader charge variation of each intermediate between two adjacent steps) on the Cr<sub>2</sub>-TV catalyst for NRR through (a) distal and (b) distal-alternating pathway.

| (a) distal         |        |        |        | (b) distal-alternating |        |        |        |
|--------------------|--------|--------|--------|------------------------|--------|--------|--------|
| intermediate       | Part A | Part B | Part C | intermediate           | Part A | Part B | Part C |
| *N-N               | 0.39   | -0.36  | -0.04  | *N-N                   | 0.39   | -0.36  | -0.04  |
| *N-NH              | 0.29   | -0.24  | -0.04  | *N-NH                  | 0.29   | -0.24  | -0.04  |
| *N-NH <sub>2</sub> | -0.11  | 0.01   | 0.10   | *N-NH <sub>2</sub>     | -0.11  | 0.01   | 0.10   |
| *N                 | 0.30   | -0.22  | -0.08  | *NH-NH <sub>2</sub>    | -0.14  | 0.07   | 0.08   |
| *NH                | -0.09  | 0.11   | -0.01  | *NH                    | 0.34   | -0.17  | -0.17  |
| *NH <sub>2</sub>   | -0.29  | 0.17   | 0.11   | *NH <sub>2</sub>       | -0.29  | 0.17   | 0.11   |
| *NH <sub>3</sub>   | -0.59  | 0.29   | 0.29   | *NH <sub>3</sub>       | -0.59  | 0.29   | 0.29   |

**Notes:** \* denotes the active site on the surface of catalysts that the adsorbed intermediate connected to.

**Table S16.** The charge variations (the Bader charge variation of each intermediate between two adjacent steps) on the Mo<sub>2</sub>-TV catalyst for NRR through (c) consecutive pathway, (d) distal pathways, (e) enzymatic-consecutive pathway.

| (c) consecutive     |        |        |        | (d) distal           |        |        |        | (e) enzymatic-consecutive |        |        |        |
|---------------------|--------|--------|--------|----------------------|--------|--------|--------|---------------------------|--------|--------|--------|
| intermediate        | Part A | Part B | Part C | intermediate         | Part A | Part B | Part C | intermediate              | Part A | Part B | Part C |
| *N-*N               | 0.37   | 0.00   | -0.38  | *N-*N                | 0.28   | -0.16  | -0.12  | *N-*N                     | 0.85   | -0.92  | 0.06   |
| *N-*NH              | 0.57   | -0.82  | 0.25   | *N-*NH               | 0.46   | -0.62  | 0.16   | *N-*NH                    | -0.01  | 0.14   | -0.13  |
| *N-*NH <sub>2</sub> | -0.24  | 0.17   | 0.07   | *N-*NH <sub>2</sub>  | -0.08  | 0.09   | -0.01  | *N-*NH <sub>2</sub>       | -0.07  | -0.05  | 0.12   |
| *N                  | 0.24   | -0.17  | -0.07  | *NH-*NH <sub>2</sub> | 0.28   | -0.12  | -0.16  | *NH-*NH <sub>2</sub>      | -0.34  | 0.32   | 0.01   |
| *NH                 | -0.12  | -0.08  | 0.20   | *NH                  | -0.12  | -0.08  | 0.20   | *NH                       | 0.39   | -0.38  | 0.00   |
| *NH <sub>2</sub>    | -0.31  | 0.35   | -0.04  | *NH <sub>2</sub>     | -0.31  | 0.35   | -0.04  | *NH <sub>2</sub>          | -0.31  | 0.35   | -0.04  |
| *NH <sub>3</sub>    | -0.60  | 0.49   | 0.11   | *NH <sub>3</sub>     | -0.60  | 0.49   | 0.11   | *NH <sub>3</sub>          | -0.60  | 0.49   | 0.11   |

**Notes:** \* denotes the active site on the surface of catalysts that the adsorbed intermediate connected to.

**Table S17.** The charge variations (the Bader charge variation of each intermediate between two adjacent steps) on the Ir<sub>2</sub>-TV catalyst for NRR through (f) consecutive-enzymatic pathway, (g) enzymatic-consecutive pathway and (h) consecutive-enzymatic pathway.

| (f) consecutive     |        |        |        | (g) enzymatic-consecutive |        |        |        | (h) enzymatic-consecutive |        |        |        |
|---------------------|--------|--------|--------|---------------------------|--------|--------|--------|---------------------------|--------|--------|--------|
| intermediate        | Part A | Part B | Part C | intermediate              | Part A | Part B | Part C | intermediate              | Part A | Part B | Part C |
| *N-*N               | 0.41   | -0.22  | -0.18  | *N-*N                     | 0.41   | -0.22  | -0.18  | *N-*N                     | 0.41   | -0.22  | -0.18  |
| *N-*NH              | -0.07  | -0.10  | 0.17   | *NH-*N                    | -0.07  | -0.10  | 0.17   | *N-*NH                    | -0.07  | -0.10  | 0.17   |
| *N-*NH <sub>2</sub> | 0.04   | 0.02   | -0.06  | *NH-*NH                   | 0.16   | -0.03  | -0.13  | *NH-*NH                   | 0.16   | -0.03  | -0.13  |
| *N                  | 0.17   | -0.10  | -0.07  | *NH-*NH <sub>2</sub>      | -0.32  | 0.10   | 0.22   | *NH <sub>2</sub> -*NH     | -0.31  | 0.01   | 0.29   |
| *NH                 | -0.03  | 0.01   | 0.02   | *NH                       | 0.35   | -0.15  | -0.20  | *NH                       | 0.31   | 0.06   | -0.38  |
| *NH <sub>2</sub>    | -0.25  | 0.20   | 0.05   | *NH <sub>2</sub>          | -0.26  | 0.20   | 0.06   | *NH <sub>2</sub>          | -0.23  | 0.08   | 0.15   |
| *NH <sub>3</sub>    | -0.46  | 0.19   | 0.26   | *NH <sub>3</sub>          | -0.46  | 0.19   | 0.26   | *NH <sub>3</sub>          | -0.46  | 0.19   | 0.26   |

**Notes:** \* denotes the active site on the surface of catalysts that the adsorbed intermediate connected to.

**Table S18.** The comparison of the catalytic performance between  $U_{\text{onset-HER}}$  and  $U_{\text{onset-NRR}}$ .

| Catalyst            | $U_{\text{onset-HER}}$ (V) | $U_{\text{onset-NRR}}$ (V) |
|---------------------|----------------------------|----------------------------|
| Cr <sub>2</sub> -TV | -0.26                      | -0.24                      |
| Mo <sub>2</sub> -TV | -0.58                      | -0.39                      |
| Ir <sub>2</sub> -TV | -0.01                      | -0.38                      |



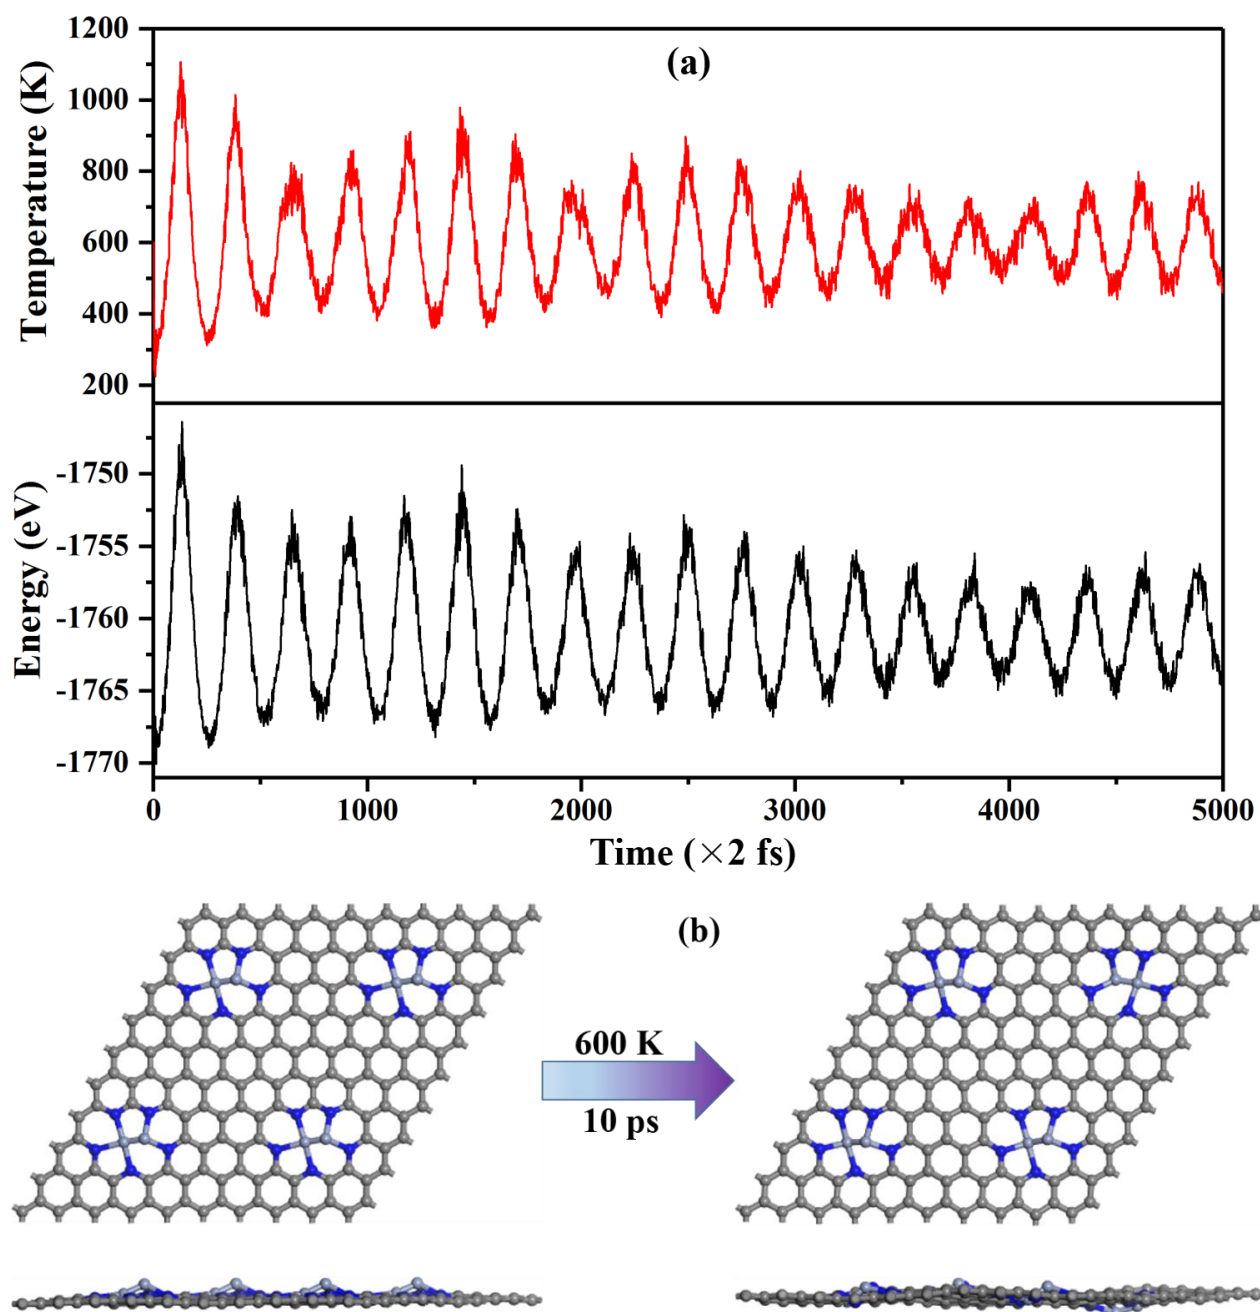

**Figure S2.** (a) The evolution curve of temperature and energy versus the simulation time for the Cr<sub>2</sub>-TV catalyst. (b) The top and side views of the snapshots of Cr<sub>2</sub>-TV catalyst before and after AIMD simulations. The simulations were performed at 600 K for 10 ps with a time step of 2 fs.

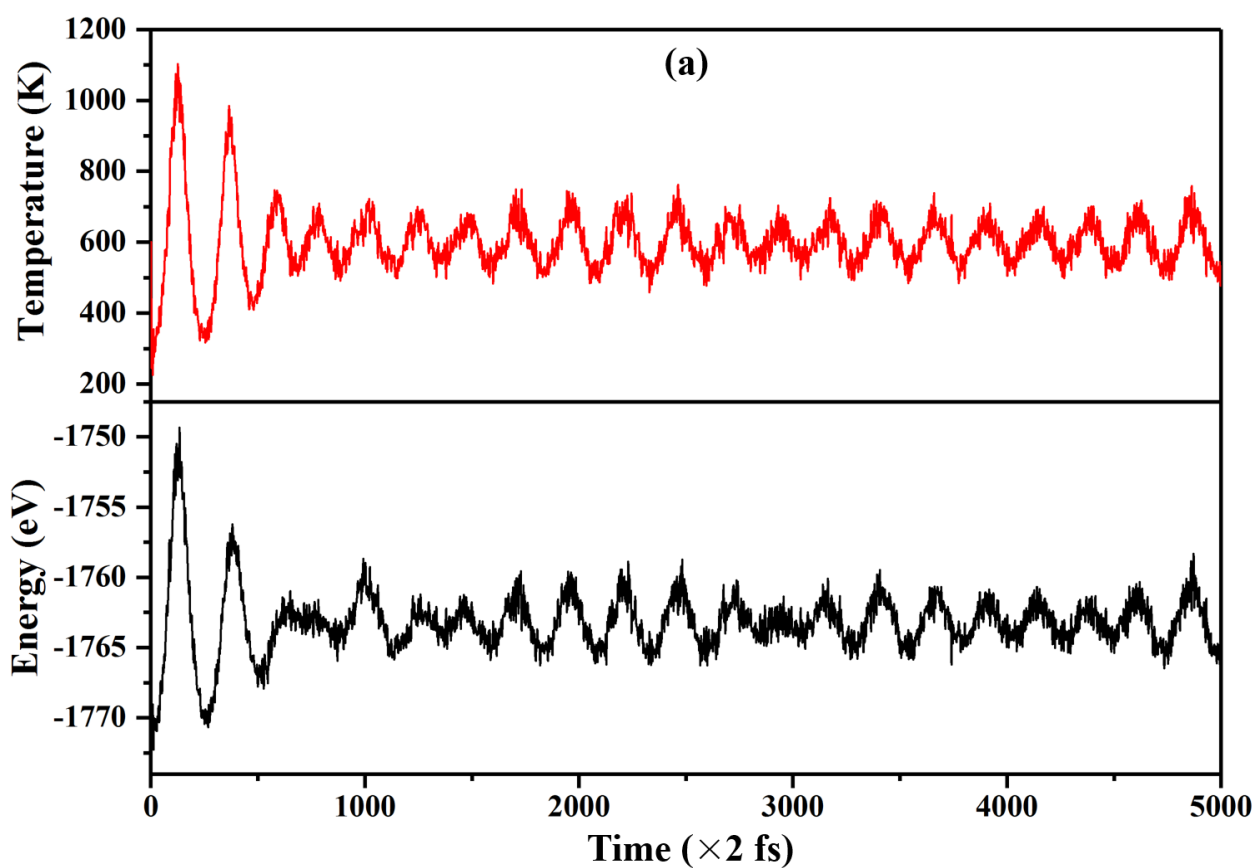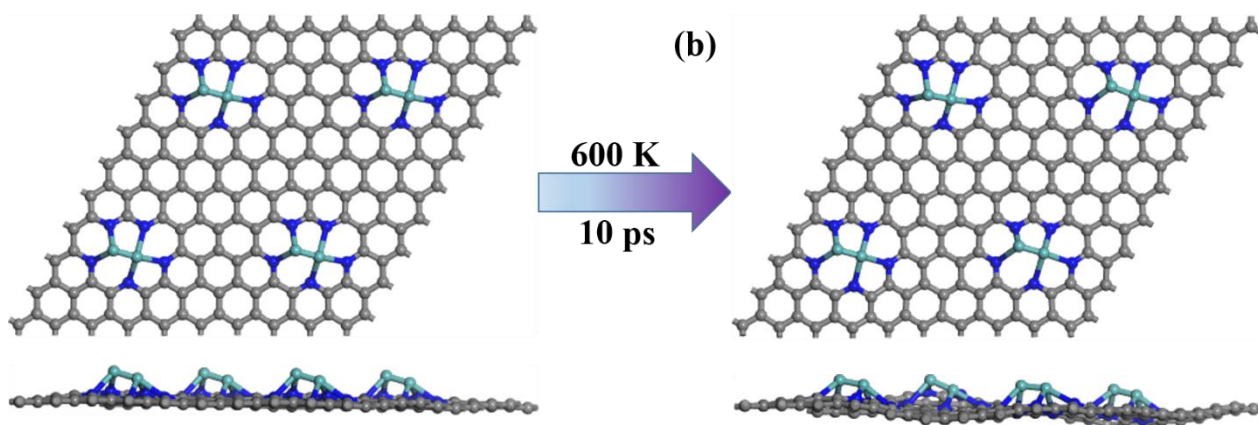

**Figure S3.** (a) The evolution curve of temperature and energy versus the simulation time for the Mo<sub>2</sub>-TV catalyst. (b) The top and side views of the snapshots of Mo<sub>2</sub>-TV catalyst before and after AIMD simulations. The simulations were performed at 600 K for 10 ps with a time step of 2 fs.

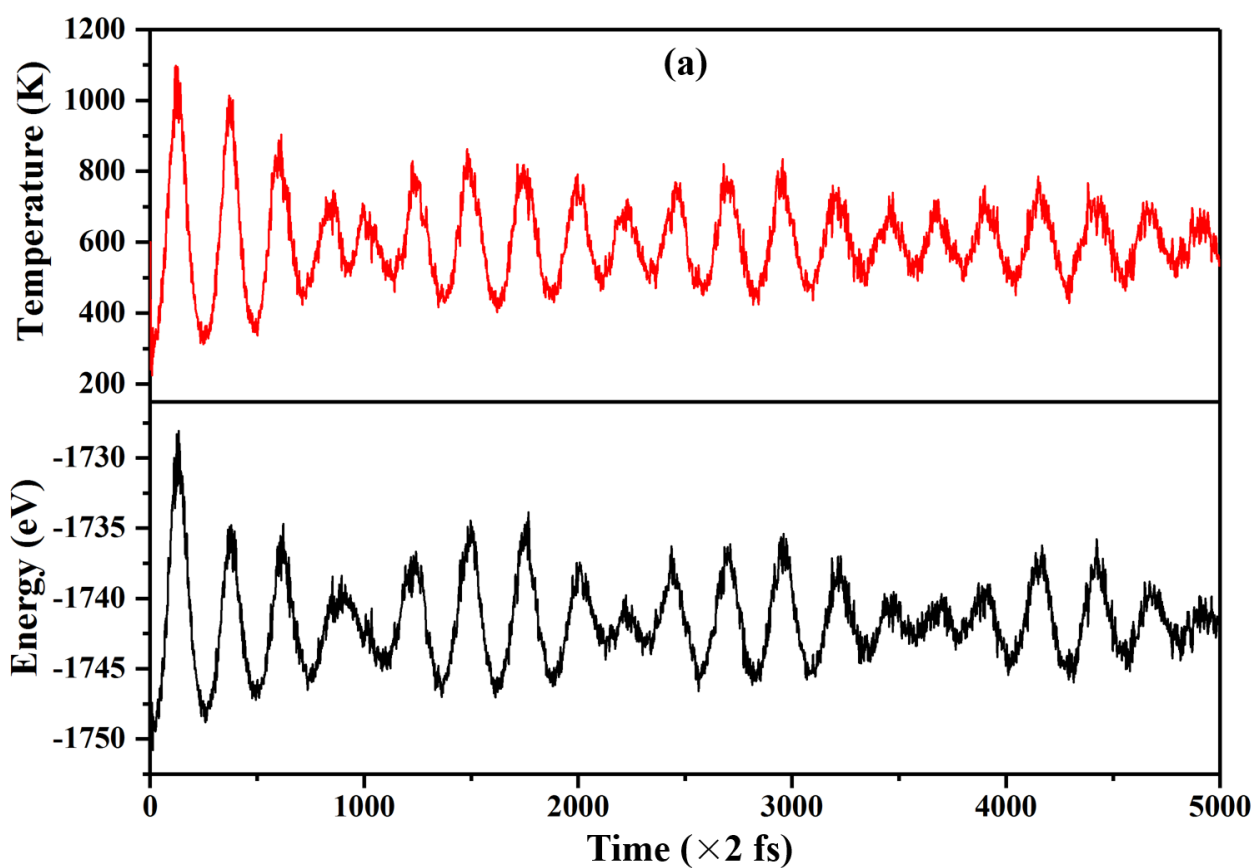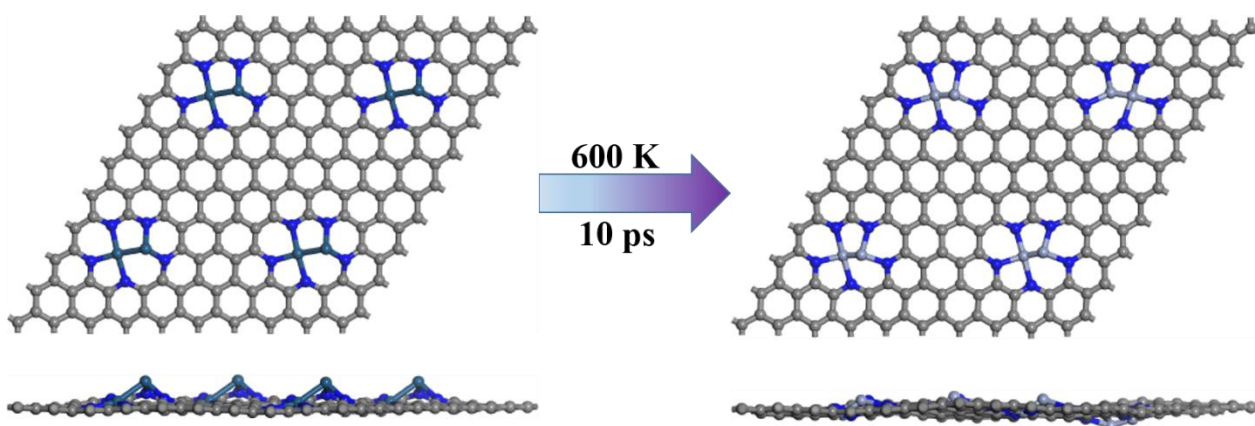

**Figure S4.** (a) The evolution curve of temperature and energy versus the simulation time for the Ir<sub>2</sub>-TV catalyst. (b) The top and side views of the snapshots of Ir<sub>2</sub>-TV catalyst before and after AIMD simulations. The simulations were performed at 600 K for 10 ps with a time step of 2 fs.



**Table S19.** The structure, lattice constant, space group and point group of catalysts.

**Notes:** / means that the corresponding configuration doesn't exit.

| Catalysts         | Sc <sub>2</sub> -DV-A                                                             | Sc <sub>2</sub> -DV-B                                                             | Sc <sub>2</sub> -TV-A                                                              | Sc <sub>2</sub> -TV-B                                                               | Sc <sub>2</sub> -QV-A                                                               | Sc <sub>2</sub> -QV-B |
|-------------------|-----------------------------------------------------------------------------------|-----------------------------------------------------------------------------------|------------------------------------------------------------------------------------|-------------------------------------------------------------------------------------|-------------------------------------------------------------------------------------|-----------------------|
| Crystal structure | 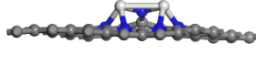 |  |  |  |  | /                     |
|                   |  |  |  |  |  | /                     |
| Lattice constant  | a = 12.36 Å<br>b = 12.29 Å<br>c = 16.82 Å                                         | a = 12.42 Å<br>b = 12.08 Å<br>c = 17.07 Å                                         | a = 12.28 Å<br>b = 12.28 Å<br>c = 16.98 Å                                          | a = 12.36 Å<br>b = 12.26 Å<br>c = 16.86 Å                                           | a = 12.25 Å<br>b = 12.31 Å<br>c = 16.94 Å                                           | /                     |
| Space group       | Cm (#8)                                                                           | P1 (#1)                                                                           | P1 (#1)                                                                            | C2 (#5)                                                                             | C2 (#5)                                                                             | /                     |
| Point group       | Cs-3                                                                              | C1-1                                                                              | C1-1                                                                               | C2-3                                                                                | C2-3                                                                                | /                     |

| Catalysts         | Ti <sub>2</sub> -DV-A                                                              | Ti <sub>2</sub> -DV-B                                                              | Ti <sub>2</sub> -TV-A                                                               | Ti <sub>2</sub> -TV-B                                                                | Ti <sub>2</sub> -QV-A                                                                | Ti <sub>2</sub> -QV-B |
|-------------------|------------------------------------------------------------------------------------|------------------------------------------------------------------------------------|-------------------------------------------------------------------------------------|--------------------------------------------------------------------------------------|--------------------------------------------------------------------------------------|-----------------------|
| Crystal structure | 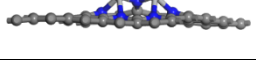  |   |   |   |   | /                     |
|                   |  |  |  |  |  | /                     |
| Lattice constant  | a = 12.35 Å<br>b = 12.28 Å<br>c = 16.83 Å                                          | a = 12.36 Å<br>b = 12.23 Å<br>c = 16.92 Å                                          | a = 12.32 Å<br>b = 12.29 Å<br>c = 16.87 Å                                           | a = 12.36 Å<br>b = 12.24 Å<br>c = 16.87 Å                                            | a = 12.25 Å<br>b = 12.30 Å<br>c = 16.97 Å                                            | /                     |
| Space group       | Cm (#8)                                                                            | P1 (#1)                                                                            | P1 (#1)                                                                             | C2 (#5)                                                                              | C2 (#5)                                                                              | /                     |
| Point group       | Cs-3                                                                               | C1-1                                                                               | C1-1                                                                                | C2-3                                                                                 | C2-3                                                                                 | /                     |

| Catalysts         | V <sub>2</sub> DV-A                                                               | V <sub>2</sub> DV-B                                                               | V <sub>2</sub> TV-A                                                                | V <sub>2</sub> TV-B                                                                 | V <sub>2</sub> QV-A                                                                 | V <sub>2</sub> QV-B                                                                 |
|-------------------|-----------------------------------------------------------------------------------|-----------------------------------------------------------------------------------|------------------------------------------------------------------------------------|-------------------------------------------------------------------------------------|-------------------------------------------------------------------------------------|-------------------------------------------------------------------------------------|
| Crystal structure |  |  |  |  |  |  |
|                   |  |  |  |  |  |  |
| Lattice constant  | a = 12.35 Å<br>b = 12.27 Å<br>c = 16.86 Å                                         | a = 12.37 Å<br>b = 12.27 Å<br>c = 16.81 Å                                         | a = 12.70 Å<br>b = 12.29 Å<br>c = 16.76 Å                                          | a = 12.38 Å<br>b = 12.22 Å<br>c = 16.84 Å                                           | a = 12.33 Å<br>b = 12.30 Å<br>c = 16.90 Å                                           | a = 12.24 Å<br>b = 12.30 Å<br>c = 16.98 Å                                           |
| Space group       | Cm (#8)                                                                           | P1 (#1)                                                                           | Cm (#8)                                                                            | C2 (#5)                                                                             | Amm2 (#38)                                                                          | C2 (#5)                                                                             |
| Point group       | Cs-3                                                                              | C1-1                                                                              | Cs-3                                                                               | C2-3                                                                                | C2V-14                                                                              | C2-3                                                                                |

| Catalysts         | Cr <sub>2</sub> DV-A                                                               | Cr <sub>2</sub> DV-B                                                               | Cr <sub>2</sub> TV-A                                                                | Cr <sub>2</sub> TV-B                                                                 | Cr <sub>2</sub> QV-A                                                                 | Cr <sub>2</sub> QV-B |
|-------------------|------------------------------------------------------------------------------------|------------------------------------------------------------------------------------|-------------------------------------------------------------------------------------|--------------------------------------------------------------------------------------|--------------------------------------------------------------------------------------|----------------------|
| Crystal structure | 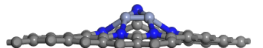  |   |   |   |   | /                    |
|                   |  |  |  |  |  | /                    |
| Lattice constant  | a = 12.36 Å<br>b = 12.21 Å<br>c = 16.89 Å                                          | a = 12.42 Å<br>b = 12.26 Å<br>c = 16.81 Å                                          | a = 12.43 Å<br>b = 12.24 Å<br>c = 16.81 Å                                           | a = 12.35 Å<br>b = 12.24 Å<br>c = 16.81 Å                                            | a = 12.29 Å<br>b = 12.29 Å<br>c = 16.94 Å                                            | /                    |
| Space group       | Cm (#8)                                                                            | P1 (#1)                                                                            | P1 (#1)                                                                             | P1 (#1)                                                                              | C2 (#5)                                                                              | /                    |
| Point group       | Cs-3                                                                               | C1-1                                                                               | C1-1                                                                                | C1-1                                                                                 | C2-3                                                                                 | /                    |

| Catalysts         | Mn <sub>2</sub> -DV-A                                                             | Mn <sub>2</sub> -DV-B | Mn <sub>2</sub> -TV-A                                                              | Mn <sub>2</sub> -TV-B | Mn <sub>2</sub> -QV-A                                                               | Mn <sub>2</sub> -QV-B                                                               |
|-------------------|-----------------------------------------------------------------------------------|-----------------------|------------------------------------------------------------------------------------|-----------------------|-------------------------------------------------------------------------------------|-------------------------------------------------------------------------------------|
| Crystal structure | 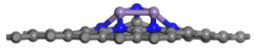 | /                     |  | /                     |  |  |
|                   |  | /                     |  | /                     |  |  |
| Lattice constant  | a = 12.37 Å<br>b = 12.27 Å<br>c = 16.83 Å                                         | /                     | a = 12.38 Å<br>b = 12.23 Å<br>c = 16.73 Å                                          | /                     | a = 12.26 Å<br>b = 12.33 Å<br>c = 16.91 Å                                           | a = 12.25 Å<br>b = 12.31 Å<br>c = 16.95 Å                                           |
| Space group       | Cm (#8)                                                                           | /                     | C2 (#5)                                                                            | /                     | Amm2 (#38)                                                                          | C2 (#5)                                                                             |
| Point group       | Cs-3                                                                              | /                     | C2-3                                                                               | /                     | C2v-14                                                                              | C2-3                                                                                |

| Catalysts         | Fe <sub>2</sub> -DV-A                                                              | Fe <sub>2</sub> -DV-B                                                              | Fe <sub>2</sub> -TV-A                                                               | Fe <sub>2</sub> -TV-B | Fe <sub>2</sub> -QV-A                                                                | Fe <sub>2</sub> -QV-B |
|-------------------|------------------------------------------------------------------------------------|------------------------------------------------------------------------------------|-------------------------------------------------------------------------------------|-----------------------|--------------------------------------------------------------------------------------|-----------------------|
| Crystal structure | 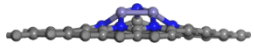  |   |   | /                     |   | /                     |
|                   |  |  |  | /                     |  | /                     |
| Lattice constant  | a = 12.38 Å<br>b = 12.26 Å<br>c = 16.82 Å                                          | a = 12.43 Å<br>b = 12.26 Å<br>c = 16.80 Å                                          | a = 12.36 Å<br>b = 12.26 Å<br>c = 16.85 Å                                           | /                     | a = 12.22 Å<br>b = 12.34 Å<br>c = 16.92 Å                                            | /                     |
| Space group       | Cm (#8)                                                                            | P1 (#1)                                                                            | C2 (#5)                                                                             | /                     | C2 (#5)                                                                              | /                     |
| Point group       | Cs-3                                                                               | C1-1                                                                               | C2-3                                                                                | /                     | C2-3                                                                                 | /                     |

| Catalysts         | Co <sub>2</sub> -DV-A                                                             | Co <sub>2</sub> -DV-B | Co <sub>2</sub> -TV-A                                                              | Co <sub>2</sub> -TV-B | Co <sub>2</sub> -QV-A                                                               | Co <sub>2</sub> -QV-B |
|-------------------|-----------------------------------------------------------------------------------|-----------------------|------------------------------------------------------------------------------------|-----------------------|-------------------------------------------------------------------------------------|-----------------------|
| Crystal structure | 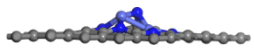 | /                     |  | /                     |  | /                     |
|                   |  | /                     |  | /                     |  | /                     |
| Lattice constant  | a = 12.42 Å<br>b = 12.27 Å<br>c = 16.80 Å                                         | /                     | a = 12.34 Å<br>b = 12.26 Å<br>c = 16.88 Å                                          | /                     | a = 12.20 Å<br>b = 12.33 Å<br>c = 16.96 Å                                           | /                     |
| Space group       | P1 (#1)                                                                           | /                     | C2 (#5)                                                                            | /                     | Amm2 (#38)                                                                          | /                     |
| Point group       | C1-1                                                                              | /                     | C2-3                                                                               | /                     | C2v-14                                                                              | /                     |

| Catalysts         | Ni <sub>2</sub> -DV-A                                                              | Ni <sub>2</sub> -DV-B                                                              | Ni <sub>2</sub> -TV-A                                                               | Ni <sub>2</sub> -TV-B | Ni <sub>2</sub> -QV-A                                                                | Ni <sub>2</sub> -QV-B |
|-------------------|------------------------------------------------------------------------------------|------------------------------------------------------------------------------------|-------------------------------------------------------------------------------------|-----------------------|--------------------------------------------------------------------------------------|-----------------------|
| Crystal structure | 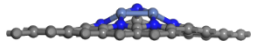  |   |   | /                     |   | /                     |
|                   |  |  |  | /                     |  | /                     |
| Lattice constant  | a = 12.37 Å<br>b = 12.28 Å<br>c = 16.81 Å                                          | a = 12.37 Å<br>b = 12.26 Å<br>c = 16.83 Å                                          | a = 12.39 Å<br>b = 12.24 Å<br>c = 16.90 Å                                           | /                     | a = 12.12 Å<br>b = 12.33 Å<br>c = 16.97 Å                                            | /                     |
| Space group       | Cm (#8)                                                                            | Cm (#8)                                                                            | P1 (#1)                                                                             | /                     | Amm2 (#38)                                                                           | /                     |
| Point group       | Cs-3                                                                               | Cs-3                                                                               | C1-1                                                                                | /                     | C2v-14                                                                               | /                     |



| Catalysts         | Cu <sub>2</sub> -DV-A                                                             | Cu <sub>2</sub> -DV-B | Cu <sub>2</sub> -TV-A                                                              | Cu <sub>2</sub> -TV-B | Cu <sub>2</sub> -QV-A                                                               | Cu <sub>2</sub> -QV-B |
|-------------------|-----------------------------------------------------------------------------------|-----------------------|------------------------------------------------------------------------------------|-----------------------|-------------------------------------------------------------------------------------|-----------------------|
| Crystal structure | 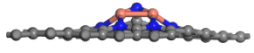 | /                     |  | /                     |  | /                     |
|                   |  | /                     |  | /                     |  | /                     |
| Lattice constant  | a = 12.37 Å<br>b = 12.28 Å<br>c = 16.81 Å                                         | /                     | a = 12.40 Å<br>b = 12.25 Å<br>c = 16.87 Å                                          | /                     | a = 12.20 Å<br>b = 12.35 Å<br>c = 16.93 Å                                           | /                     |
| Space group       | Cm (#8)                                                                           | /                     | P1 (#1)                                                                            | /                     | Cm (#8)                                                                             | /                     |
| Point group       | Cs-3                                                                              | /                     | C1-1                                                                               | /                     | Cs-3                                                                                | /                     |

| Catalysts         | Zn <sub>2</sub> -DV-A                                                              | Zn <sub>2</sub> -DV-B | Zn <sub>2</sub> -TV-A                                                               | Zn <sub>2</sub> -TV-B | Zn <sub>2</sub> -QV-A                                                                | Zn <sub>2</sub> -QV-B |
|-------------------|------------------------------------------------------------------------------------|-----------------------|-------------------------------------------------------------------------------------|-----------------------|--------------------------------------------------------------------------------------|-----------------------|
| Crystal structure | 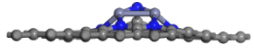  | /                     |   | /                     |   | /                     |
|                   |  | /                     |  | /                     |  | /                     |
| Lattice constant  | a = 12.38 Å<br>b = 12.29 Å<br>c = 16.78 Å                                          | /                     | a = 12.36 Å<br>b = 12.21 Å<br>c = 16.92 Å                                           | /                     | a = 12.22 Å<br>b = 12.42 Å<br>c = 16.78 Å                                            | /                     |
| Space group       | Cm (#8)                                                                            | /                     | P1 (#1)                                                                             | /                     | Amm2 (#38)                                                                           | /                     |
| Point group       | Cs-3                                                                               | /                     | C1-1                                                                                | /                     | C2v-14                                                                               | /                     |

| Catalysts         | Y <sub>2</sub> DV-A                                                               | Y <sub>2</sub> DV-B                                                               | Y <sub>2</sub> TV-A                                                                | Y <sub>2</sub> TV-B                                                                 | Y <sub>2</sub> QV-A                                                                 | Y <sub>2</sub> QV-B                                                                 |
|-------------------|-----------------------------------------------------------------------------------|-----------------------------------------------------------------------------------|------------------------------------------------------------------------------------|-------------------------------------------------------------------------------------|-------------------------------------------------------------------------------------|-------------------------------------------------------------------------------------|
| Crystal structure | 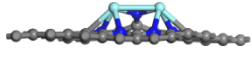 |  |  |  |  |  |
|                   |  |  |  |  |  |  |
| Lattice constant  | a = 12.36 Å<br>b = 12.29 Å<br>c = 16.82 Å                                         | a = 12.25 Å<br>b = 12.07 Å<br>c = 17.09 Å                                         | a = 12.41 Å<br>b = 12.23 Å<br>c = 16.83 Å                                          | a = 12.37 Å<br>b = 12.26 Å<br>c = 16.83 Å                                           | a = 12.25 Å<br>b = 12.33 Å<br>c = 16.92 Å                                           | a = 12.27 Å<br>b = 12.32 Å<br>c = 16.91 Å                                           |
| Space group       | Cm (#8)                                                                           | P1 (#1)                                                                           | P1 (#1)                                                                            | C2 (#5)                                                                             | Cm (#8)                                                                             | C2 (#5)                                                                             |
| Point group       | Cs-3                                                                              | C1-1                                                                              | C1-1                                                                               | C2-3                                                                                | Cs-3                                                                                | C2-3                                                                                |

| Catalysts         | Zr <sub>2</sub> DV-A                                                               | Zr <sub>2</sub> DV-B                                                               | Zr <sub>2</sub> TV-A                                                                | Zr <sub>2</sub> TV-B                                                                 | Zr <sub>2</sub> QV-A                                                                 | Zr <sub>2</sub> QV-B |
|-------------------|------------------------------------------------------------------------------------|------------------------------------------------------------------------------------|-------------------------------------------------------------------------------------|--------------------------------------------------------------------------------------|--------------------------------------------------------------------------------------|----------------------|
| Crystal structure | 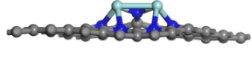  |   |   |   |   | /                    |
|                   |  |  |  |  |  | /                    |
| Lattice constant  | a = 12.36 Å<br>b = 12.28 Å<br>c = 16.83 Å                                          | a = 12.36 Å<br>b = 12.24 Å<br>c = 16.92 Å                                          | a = 12.29 Å<br>b = 12.27 Å<br>c = 16.97 Å                                           | a = 12.32 Å<br>b = 12.21 Å<br>c = 16.96 Å                                            | a = 12.19 Å<br>b = 12.28 Å<br>c = 17.06 Å                                            | /                    |
| Space group       | Cm (#8)                                                                            | P1 (#1)                                                                            | P1 (#1)                                                                             | P1 (#1)                                                                              | C2 (#5)                                                                              | /                    |
| Point group       | Cs-3                                                                               | C1-1                                                                               | C1-1                                                                                | C1-1                                                                                 | C2-3                                                                                 | /                    |

| Catalysts         | Nb <sub>2</sub> -DV-A                                                             | Nb <sub>2</sub> -DV-B | Nb <sub>2</sub> -TV-A                                                              | Nb <sub>2</sub> -TV-B | Nb <sub>2</sub> -QV-A                                                               | Nb <sub>2</sub> -QV-B                                                               |
|-------------------|-----------------------------------------------------------------------------------|-----------------------|------------------------------------------------------------------------------------|-----------------------|-------------------------------------------------------------------------------------|-------------------------------------------------------------------------------------|
| Crystal structure | 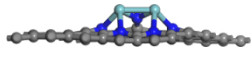 | /                     |  | /                     |  |  |
|                   |  | /                     |  | /                     |  |  |
| Lattice constant  | a = 12.35 Å<br>b = 12.29 Å<br>c = 16.83 Å                                         | /                     | a = 12.37 Å<br>b = 12.25 Å<br>c = 16.93 Å                                          | /                     | a = 12.29 Å<br>b = 12.35 Å<br>c = 16.84 Å                                           | a = 12.30 Å<br>b = 12.32 Å<br>c = 16.89 Å                                           |
| Space group       | Cm (#8)                                                                           | /                     | P1 (#1)                                                                            | /                     | Cm (#8)                                                                             | C2 (#5)                                                                             |
| Point group       | Cs-3                                                                              | /                     | C1-1                                                                               | /                     | Cs-3                                                                                | C2-3                                                                                |

| Catalysts         | Mo <sub>2</sub> -DV-A                                                              | Mo <sub>2</sub> -DV-B                                                              | Mo <sub>2</sub> -TV-A                                                               | Mo <sub>2</sub> -TV-B                                                                | Mo <sub>2</sub> -QV-A                                                                | Mo <sub>2</sub> -QV-B                                                                |
|-------------------|------------------------------------------------------------------------------------|------------------------------------------------------------------------------------|-------------------------------------------------------------------------------------|--------------------------------------------------------------------------------------|--------------------------------------------------------------------------------------|--------------------------------------------------------------------------------------|
| Crystal structure | 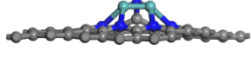  |   |   |   |   |   |
|                   |  |  |  |  |  |  |
| Lattice constant  | a = 12.35 Å<br>b = 12.22 Å<br>c = 16.91 Å                                          | a = 12.34 Å<br>b = 12.25 Å<br>c = 16.89 Å                                          | a = 12.32 Å<br>b = 12.23 Å<br>c = 16.90 Å                                           | a = 12.46 Å<br>b = 12.26 Å<br>c = 16.67 Å                                            | a = 12.36 Å<br>b = 12.34 Å<br>c = 16.79 Å                                            | a = 12.40 Å<br>b = 12.38 Å<br>c = 16.69 Å                                            |
| Space group       | Cm (#8)                                                                            | P1 (#1)                                                                            | P1 (#1)                                                                             | C2 (#5)                                                                              | Cm (#8)                                                                              | Amm2 (#38)                                                                           |
| Point group       | Cs-3                                                                               | C1-1                                                                               | C1-1                                                                                | C2-3                                                                                 | Cs-3                                                                                 | C2v-14                                                                               |

| Catalysts         | Tc <sub>2</sub> -DV-A                                                             | Tc <sub>2</sub> -DV-B                                                             | Tc <sub>2</sub> -TV-A                                                              | Tc <sub>2</sub> -TV-B | Tc <sub>2</sub> -QV-A                                                               | Tc <sub>2</sub> -QV-B                                                               |
|-------------------|-----------------------------------------------------------------------------------|-----------------------------------------------------------------------------------|------------------------------------------------------------------------------------|-----------------------|-------------------------------------------------------------------------------------|-------------------------------------------------------------------------------------|
| Crystal structure | 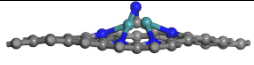 |  |  | /                     |  |  |
|                   |  |  |  | /                     |  |  |
| Lattice constant  | a = 12.37 Å<br>b = 12.20 Å<br>c = 16.88 Å                                         | a = 12.42 Å<br>b = 12.31 Å<br>c = 16.69 Å                                         | a = 12.42 Å<br>b = 12.23 Å<br>c = 16.82 Å                                          | /                     | a = 12.33 Å<br>b = 12.28 Å<br>c = 16.93 Å                                           | a = 12.24 Å<br>b = 12.35 Å<br>c = 16.72 Å                                           |
| Space group       | P1 (#1)                                                                           | C2 (#5)                                                                           | Cm (#8)                                                                            | /                     | Cm (#8)                                                                             | C2 (#5)                                                                             |
| Point group       | C1-1                                                                              | C2-3                                                                              | Cs-3                                                                               | /                     | Cs-3                                                                                | C2-3                                                                                |

| Catalysts         | Ru <sub>2</sub> -DV-A                                                              | Ru <sub>2</sub> -DV-B                                                              | Ru <sub>2</sub> -TV-A                                                               | Ru <sub>2</sub> -TV-B | Ru <sub>2</sub> -QV-A                                                                | Ru <sub>2</sub> -QV-B |
|-------------------|------------------------------------------------------------------------------------|------------------------------------------------------------------------------------|-------------------------------------------------------------------------------------|-----------------------|--------------------------------------------------------------------------------------|-----------------------|
| Crystal structure | 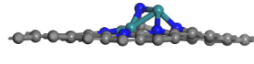  |   |   | /                     |   | /                     |
|                   |  |  |  | /                     |  | /                     |
| Lattice constant  | a = 12.33 Å<br>b = 12.28 Å<br>c = 16.88 Å                                          | a = 12.42 Å<br>b = 12.32 Å<br>c = 16.69 Å                                          | a = 12.35 Å<br>b = 12.24 Å<br>c = 16.78 Å                                           | /                     | a = 12.31 Å<br>b = 12.34 Å<br>c = 16.85 Å                                            | /                     |
| Space group       | P1 (#1)                                                                            | C2 (#5)                                                                            | P1 (#1)                                                                             | /                     | C2 (#5)                                                                              | /                     |
| Point group       | C1-1                                                                               | C2-3                                                                               | C1-1                                                                                | /                     | C2-3                                                                                 | /                     |

| Catalysts         | Rh <sub>2</sub> -DV-A                                                             | Rh <sub>2</sub> -DV-B                                                             | Rh <sub>2</sub> -TV-A                                                              | Rh <sub>2</sub> -TV-B                                                               | Rh <sub>2</sub> -QV-A                                                               | Rh <sub>2</sub> -QV-B |
|-------------------|-----------------------------------------------------------------------------------|-----------------------------------------------------------------------------------|------------------------------------------------------------------------------------|-------------------------------------------------------------------------------------|-------------------------------------------------------------------------------------|-----------------------|
| Crystal structure | 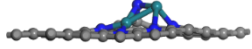 |  |  |  |  | /                     |
|                   |  |  |  |  |  | /                     |
| Lattice constant  | a = 12.33 Å<br>b = 12.28 Å<br>c = 16.81 Å                                         | a = 12.36 Å<br>b = 12.23 Å<br>c = 16.90 Å                                         | a = 12.30 Å<br>b = 12.24 Å<br>c = 16.86 Å                                          | a = 12.39 Å<br>b = 12.28 Å<br>c = 16.77 Å                                           | a = 12.28 Å<br>b = 12.34 Å<br>c = 16.86 Å                                           | /                     |
| Space group       | P1 (#1)                                                                           | P1 (#1)                                                                           | P1 (#1)                                                                            | C2 (#5)                                                                             | C2 (#5)                                                                             | /                     |
| Point group       | C1-1                                                                              | C1-1                                                                              | C1-1                                                                               | C2-3                                                                                | C2-3                                                                                | /                     |

| Catalysts         | Pd <sub>2</sub> -DV-A                                                              | Pd <sub>2</sub> -DV-B | Pd <sub>2</sub> -TV-A                                                               | Pd <sub>2</sub> -TV-B | Pd <sub>2</sub> -QV-A                                                                | Pd <sub>2</sub> -QV-B |
|-------------------|------------------------------------------------------------------------------------|-----------------------|-------------------------------------------------------------------------------------|-----------------------|--------------------------------------------------------------------------------------|-----------------------|
| Crystal structure | 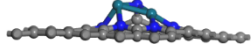  | /                     |   | /                     |   | /                     |
|                   |  | /                     |  | /                     |  | /                     |
| Lattice constant  | a = 12.37 Å<br>b = 12.26 Å<br>c = 16.84 Å                                          | /                     | a = 12.33 Å<br>b = 12.22 Å<br>c = 16.87 Å                                           | /                     | a = 12.28 Å<br>b = 12.45 Å<br>c = 16.67 Å                                            | /                     |
| Space group       | P1 (#1)                                                                            | /                     | P1 (#1)                                                                             | /                     | C2 (#5)                                                                              | /                     |
| Point group       | C1-1                                                                               | /                     | C1-1                                                                                | /                     | C2-3                                                                                 | /                     |

| Catalysts         | Ag <sub>2</sub> -DV-A                     | Ag <sub>2</sub> -DV-B                     | Ag <sub>2</sub> -TV-A                     | Ag <sub>2</sub> -TV-B | Ag <sub>2</sub> -QV-A                     | Ag <sub>2</sub> -QV-B |
|-------------------|-------------------------------------------|-------------------------------------------|-------------------------------------------|-----------------------|-------------------------------------------|-----------------------|
| Crystal structure |                                           |                                           |                                           | /                     |                                           | /                     |
|                   |                                           |                                           |                                           | /                     |                                           | /                     |
| Lattice constant  | a = 12.35 Å<br>b = 12.25 Å<br>c = 16.88 Å | a = 12.42 Å<br>b = 12.29 Å<br>c = 16.71 Å | a = 12.38 Å<br>b = 12.23 Å<br>c = 16.84 Å | /                     | a = 12.29 Å<br>b = 12.31 Å<br>c = 16.92 Å | /                     |
| Space group       | Cm (#8)                                   | C2 (#5)                                   | C2 (#5)                                   | /                     | P1 (#1)                                   | /                     |
| Point group       | Cs-3                                      | C2-3                                      | C2-3                                      | /                     | C1-1                                      | /                     |

| Catalysts         | Cd <sub>2</sub> -DV-A                     | Cd <sub>2</sub> -DV-B                     | Cd <sub>2</sub> -TV-A                     | Cd <sub>2</sub> -TV-B | Cd <sub>2</sub> -QV-A                     | Cd <sub>2</sub> -QV-B                     |
|-------------------|-------------------------------------------|-------------------------------------------|-------------------------------------------|-----------------------|-------------------------------------------|-------------------------------------------|
| Crystal structure |                                           |                                           |                                           | /                     |                                           |                                           |
|                   |                                           |                                           |                                           | /                     |                                           |                                           |
| Lattice constant  | a = 12.35 Å<br>b = 12.30 Å<br>c = 16.84 Å | a = 12.41 Å<br>b = 12.28 Å<br>c = 16.74 Å | a = 12.41 Å<br>b = 12.21 Å<br>c = 16.81 Å | /                     | a = 12.28 Å<br>b = 12.32 Å<br>c = 16.90 Å | a = 12.25 Å<br>b = 12.31 Å<br>c = 16.96 Å |
| Space group       | Cm (#8)                                   | C2 (#5)                                   | P1 (#1)                                   | /                     | Cm (#8)                                   | C2 (#5)                                   |
| Point group       | Cs-3                                      | C2-3                                      | C1-1                                      | /                     | Cs-3                                      | C2-3                                      |

| Catalysts         | Lu <sub>2</sub> -DV-A                                                             | Lu <sub>2</sub> -DV-B                                                             | Lu <sub>2</sub> -TV-A                                                              | Lu <sub>2</sub> -TV-B                                                               | Lu <sub>2</sub> -QV-A                                                               | Lu <sub>2</sub> -QV-B                                                               |
|-------------------|-----------------------------------------------------------------------------------|-----------------------------------------------------------------------------------|------------------------------------------------------------------------------------|-------------------------------------------------------------------------------------|-------------------------------------------------------------------------------------|-------------------------------------------------------------------------------------|
| Crystal structure | 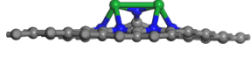 |  |  |  |  |  |
|                   |  |  |  |  |  |  |
| Lattice constant  | a = 12.35 Å<br>b = 12.28 Å<br>c = 16.86 Å                                         | a = 12.35 Å<br>b = 12.28 Å<br>c = 16.83 Å                                         | a = 12.40 Å<br>b = 12.22 Å<br>c = 16.83 Å                                          | a = 12.38 Å<br>b = 12.26 Å<br>c = 16.82 Å                                           | a = 12.24 Å<br>b = 12.32 Å<br>c = 16.94 Å                                           | a = 12.28 Å<br>b = 12.33 Å<br>c = 16.88 Å                                           |
| Space group       | Cm (#8)                                                                           | P1 (#1)                                                                           | Cm (#8)                                                                            | C2 (#5)                                                                             | Cm (#8)                                                                             | C2 (#5)                                                                             |
| Point group       | Cs-3                                                                              | C1-1                                                                              | Cs-3                                                                               | C2-3                                                                                | Cs-3                                                                                | C2-3                                                                                |

| Catalysts         | Hf <sub>2</sub> -DV-A                                                              | Hf <sub>2</sub> -DV-B                                                              | Hf <sub>2</sub> -TV-A                                                               | Hf <sub>2</sub> -TV-B                                                                | Hf <sub>2</sub> -QV-A                                                                | Hf <sub>2</sub> -QV-B                                                                |
|-------------------|------------------------------------------------------------------------------------|------------------------------------------------------------------------------------|-------------------------------------------------------------------------------------|--------------------------------------------------------------------------------------|--------------------------------------------------------------------------------------|--------------------------------------------------------------------------------------|
| Crystal structure | 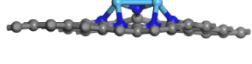  |   |   |   |   |   |
|                   |  |  |  |  |  |  |
| Lattice constant  | a = 12.35 Å<br>b = 12.27 Å<br>c = 16.86 Å                                          | a = 12.30 Å<br>b = 12.26 Å<br>c = 16.94 Å                                          | a = 12.30 Å<br>b = 12.28 Å<br>c = 16.89 Å                                           | a = 12.37 Å<br>b = 12.28 Å<br>c = 16.80 Å                                            | a = 12.24 Å<br>b = 12.33 Å<br>c = 16.93 Å                                            | a = 12.30 Å<br>b = 12.31 Å<br>c = 16.89 Å                                            |
| Space group       | Cm (#8)                                                                            | P1 (#1)                                                                            | P1 (#1)                                                                             | C2 (#5)                                                                              | Cm (#8)                                                                              | C2 (#5)                                                                              |
| Point group       | Cs-3                                                                               | C1-1                                                                               | C1-1                                                                                | C2-3                                                                                 | Cs-3                                                                                 | C2-3                                                                                 |

| Catalysts         | Ta <sub>2</sub> -DV-A                                                             | Ta <sub>2</sub> -DV-B                                                             | Ta <sub>2</sub> -TV-A                                                              | Ta <sub>2</sub> -TV-B                                                               | Ta <sub>2</sub> -QV-A                                                               | Ta <sub>2</sub> -QV-B                                                               |
|-------------------|-----------------------------------------------------------------------------------|-----------------------------------------------------------------------------------|------------------------------------------------------------------------------------|-------------------------------------------------------------------------------------|-------------------------------------------------------------------------------------|-------------------------------------------------------------------------------------|
| Crystal structure | 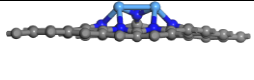 |  |  |  |  |  |
|                   |  |  |  |  |  |  |
| Lattice constant  | a = 12.36 Å<br>b = 12.29 Å<br>c = 16.82 Å                                         | a = 12.35 Å<br>b = 12.15 Å<br>c = 16.97 Å                                         | a = 12.27 Å<br>b = 12.26 Å<br>c = 16.92 Å                                          | a = 12.40 Å<br>b = 12.17 Å<br>c = 16.91 Å                                           | a = 12.32 Å<br>b = 12.36 Å<br>c = 16.79 Å                                           | a = 12.30 Å<br>b = 12.33 Å<br>c = 16.88 Å                                           |
| Space group       | Cm (#8)                                                                           | P1 (#1)                                                                           | P1 (#1)                                                                            | P1 (#1)                                                                             | Cm (#8)                                                                             | C2 (#5)                                                                             |
| Point group       | Cs-3                                                                              | C1-1                                                                              | C1-1                                                                               | C1-1                                                                                | Cs-3                                                                                | C2-3                                                                                |

| Catalysts         | W <sub>2</sub> -DV-A                                                               | W <sub>2</sub> -DV-B                                                               | W <sub>2</sub> -TV-A                                                                | W <sub>2</sub> -TV-B                                                                 | W <sub>2</sub> -QV-A                                                                 | W <sub>2</sub> -QV-B                                                                 |
|-------------------|------------------------------------------------------------------------------------|------------------------------------------------------------------------------------|-------------------------------------------------------------------------------------|--------------------------------------------------------------------------------------|--------------------------------------------------------------------------------------|--------------------------------------------------------------------------------------|
| Crystal structure | 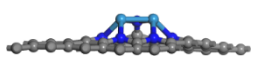  |   |   |   |   |   |
|                   |  |  |  |  |  |  |
| Lattice constant  | a = 12.35 Å<br>b = 12.25 Å<br>c = 16.88 Å                                          | a = 12.39 Å<br>b = 12.27 Å<br>c = 16.90 Å                                          | a = 12.26 Å<br>b = 12.26 Å<br>c = 16.72 Å                                           | a = 12.44 Å<br>b = 12.24 Å<br>c = 16.72 Å                                            | a = 12.27 Å<br>b = 12.32 Å<br>c = 16.90 Å                                            | a = 12.31 Å<br>b = 12.32 Å<br>c = 16.88 Å                                            |
| Space group       | Cm (#8)                                                                            | P1 (#1)                                                                            | P1 (#1)                                                                             | C2 (#5)                                                                              | Cm (#8)                                                                              | C2 (#5)                                                                              |
| Point group       | Cs-3                                                                               | C1-1                                                                               | C1-1                                                                                | C2-3                                                                                 | Cs-3                                                                                 | C2-3                                                                                 |



| Catalysts         | Re <sub>2</sub> -DV-A                                                             | Re <sub>2</sub> -DV-B                                                             | Re <sub>2</sub> -TV-A                                                              | Re <sub>2</sub> -TV-B | Re <sub>2</sub> -QV-A                                                               | Re <sub>2</sub> -QV-B |
|-------------------|-----------------------------------------------------------------------------------|-----------------------------------------------------------------------------------|------------------------------------------------------------------------------------|-----------------------|-------------------------------------------------------------------------------------|-----------------------|
| Crystal structure | 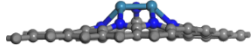 |  |  | /                     |  | /                     |
|                   |  |  |  | /                     |  | /                     |
| Lattice constant  | a = 12.34 Å<br>b = 12.26 Å<br>c = 16.88 Å                                         | a = 12.48 Å<br>b = 12.33 Å<br>c = 16.58 Å                                         | a = 12.47 Å<br>b = 12.27 Å<br>c = 16.78 Å                                          | /                     | a = 12.33 Å<br>b = 12.34 Å<br>c = 16.82 Å                                           | /                     |
| Space group       | Cm (#8)                                                                           | C2 (#5)                                                                           | P1 (#1)                                                                            | /                     | C2 (#5)                                                                             | /                     |
| Point group       | Cs-3                                                                              | C2-3                                                                              | C1-1                                                                               | /                     | C2-3                                                                                | /                     |

| Catalysts         | Os <sub>2</sub> -DV-A                                                              | Os <sub>2</sub> -DV-B                                                              | Os <sub>2</sub> -TV-A                                                               | Os <sub>2</sub> -TV-B | Os <sub>2</sub> -QV-A                                                                | Os <sub>2</sub> -QV-B |
|-------------------|------------------------------------------------------------------------------------|------------------------------------------------------------------------------------|-------------------------------------------------------------------------------------|-----------------------|--------------------------------------------------------------------------------------|-----------------------|
| Crystal structure |   |   |   | /                     |   | /                     |
|                   |  |  |  | /                     |  | /                     |
| Lattice constant  | a = 12.38 Å<br>b = 12.25 Å<br>c = 16.85 Å                                          | a = 12.43 Å<br>b = 12.33 Å<br>c = 16.65 Å                                          | a = 12.33 Å<br>b = 12.25 Å<br>c = 16.78 Å                                           | /                     | a = 12.29 Å<br>b = 12.35 Å<br>c = 16.83 Å                                            | /                     |
| Space group       | Cm (#8)                                                                            | C2 (#5)                                                                            | P1 (#1)                                                                             | /                     | C2 (#5)                                                                              | /                     |
| Point group       | Cs-3                                                                               | C2-3                                                                               | C1-1                                                                                | /                     | C2-3                                                                                 | /                     |

| Catalysts         | Ir <sub>2</sub> -DV-A                                                             | Ir <sub>2</sub> -DV-B                                                             | Ir <sub>2</sub> -TV-A                                                              | Ir <sub>2</sub> -TV-B | Ir <sub>2</sub> -QV-A                                                               | Ir <sub>2</sub> -QV-B |
|-------------------|-----------------------------------------------------------------------------------|-----------------------------------------------------------------------------------|------------------------------------------------------------------------------------|-----------------------|-------------------------------------------------------------------------------------|-----------------------|
| Crystal structure | 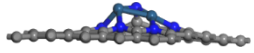 |  |  | /                     |  | /                     |
|                   |  |  |  | /                     |  | /                     |
| Lattice constant  | a = 12.39 Å<br>b = 12.27 Å<br>c = 16.82 Å                                         | a = 12.45 Å<br>b = 12.29 Å<br>c = 16.79 Å                                         | a = 12.29 Å<br>b = 12.24 Å<br>c = 16.85 Å                                          | /                     | a = 12.27 Å<br>b = 12.37 Å<br>c = 16.83 Å                                           | /                     |
| Space group       | P1 (#1)                                                                           | P1 (#1)                                                                           | P1 (#1)                                                                            | /                     | C2 (#5)                                                                             | /                     |
| Point group       | C1-1                                                                              | C1-1                                                                              | C1-1                                                                               | /                     | C2-3                                                                                | /                     |

| Catalysts         | Pt <sub>2</sub> -DV-A                                                              | Pt <sub>2</sub> -DV-B                                                              | Pt <sub>2</sub> -TV-A                                                               | Pt <sub>2</sub> -TV-B | Pt <sub>2</sub> -QV-A                                                                | Pt <sub>2</sub> -QV-B |
|-------------------|------------------------------------------------------------------------------------|------------------------------------------------------------------------------------|-------------------------------------------------------------------------------------|-----------------------|--------------------------------------------------------------------------------------|-----------------------|
| Crystal structure | 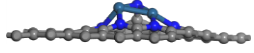  |   |   | /                     |   | /                     |
|                   |  |  |  | /                     |  | /                     |
| Lattice constant  | a = 12.38 Å<br>b = 12.27 Å<br>c = 16.82 Å                                          | a = 12.36 Å<br>b = 12.23 Å<br>c = 16.86 Å                                          | a = 12.31 Å<br>b = 12.23 Å<br>c = 16.86 Å                                           | /                     | a = 12.26 Å<br>b = 12.47 Å<br>c = 16.65 Å                                            | /                     |
| Space group       | Cm (#8)                                                                            | P1 (#1)                                                                            | Cm (#8)                                                                             | /                     | Cm (#8)                                                                              | /                     |
| Point group       | Cs-3                                                                               | C1-1                                                                               | Cs-3                                                                                | /                     | Cs-3                                                                                 | /                     |

| Catalysts         | Au <sub>2</sub> -DV-A                                                             | Au <sub>2</sub> -DV-B                                                             | Au <sub>2</sub> -TV-A                                                              | Au <sub>2</sub> -TV-B | Au <sub>2</sub> -QV-A                                                               | Au <sub>2</sub> -QV-B                                                               |
|-------------------|-----------------------------------------------------------------------------------|-----------------------------------------------------------------------------------|------------------------------------------------------------------------------------|-----------------------|-------------------------------------------------------------------------------------|-------------------------------------------------------------------------------------|
| Crystal structure | 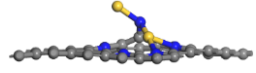 |  |  | /                     |  |  |
|                   |  |  |  | /                     |  |  |
| Lattice constant  | a = 12.36 Å<br>b = 12.27 Å<br>c = 16.84 Å                                         | a = 12.34 Å<br>b = 12.20 Å<br>c = 17.02 Å                                         | a = 12.35 Å<br>b = 12.21 Å<br>c = 16.86 Å                                          | /                     | a = 12.25 Å<br>b = 12.44 Å<br>c = 16.71 Å                                           | a = 12.28 Å<br>b = 12.49 Å<br>c = 16.60 Å                                           |
| Space group       | P1 (#1)                                                                           | P1 (#1)                                                                           | P1 (#1)                                                                            | /                     | Cm (#8)                                                                             | Amm2 (#38)                                                                          |
| Point group       | C1-1                                                                              | C1-1                                                                              | C1-1                                                                               | /                     | Cs-3                                                                                | C2v-14                                                                              |

| Catalysts         | Hg <sub>2</sub> -DV-A                                                              | Hg <sub>2</sub> -DV-B | Hg <sub>2</sub> -TV-A                                                               | Hg <sub>2</sub> -TV-B                                                                | Hg <sub>2</sub> -QV-A                                                                | Hg <sub>2</sub> -QV-B                                                                |
|-------------------|------------------------------------------------------------------------------------|-----------------------|-------------------------------------------------------------------------------------|--------------------------------------------------------------------------------------|--------------------------------------------------------------------------------------|--------------------------------------------------------------------------------------|
| Crystal structure | 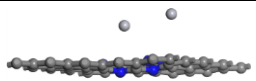  | /                     |   |   |   |   |
|                   |  | /                     |  |  |  |  |
| Lattice constant  | a = 12.40 Å<br>b = 12.13 Å<br>c = 16.18 Å                                          | /                     | a = 12.42 Å<br>b = 12.23 Å<br>c = 16.77 Å                                           | a = 12.33 Å<br>b = 12.21 Å<br>c = 16.96 Å                                            | a = 12.23 Å<br>b = 12.26 Å<br>c = 16.15 Å                                            | a = 12.23 Å<br>b = 12.26 Å<br>c = 16.07 Å                                            |
| Space group       | P1 (#1)                                                                            | /                     | P1 (#1)                                                                             | C2 (#5)                                                                              | P1 (#1)                                                                              | Amm2 (#38)                                                                           |
| Point group       | C1-1                                                                               | /                     | C1-1                                                                                | C2-3                                                                                 | C1-1                                                                                 | C2v-14                                                                               |
